# Supplementary material for: Paleoecology and evolutionary response of planktonic foraminifera to the mid-Pliocene Warm Period and Plio-Pleistocene bipolar ice sheet expansion
Source: Copernicus journal article supplement (doi:10.5194/bg-20-121-2023), 2023-01-09
Supplement: Supplementary file 1 [file bg-20-121-2023-supplement.zip]

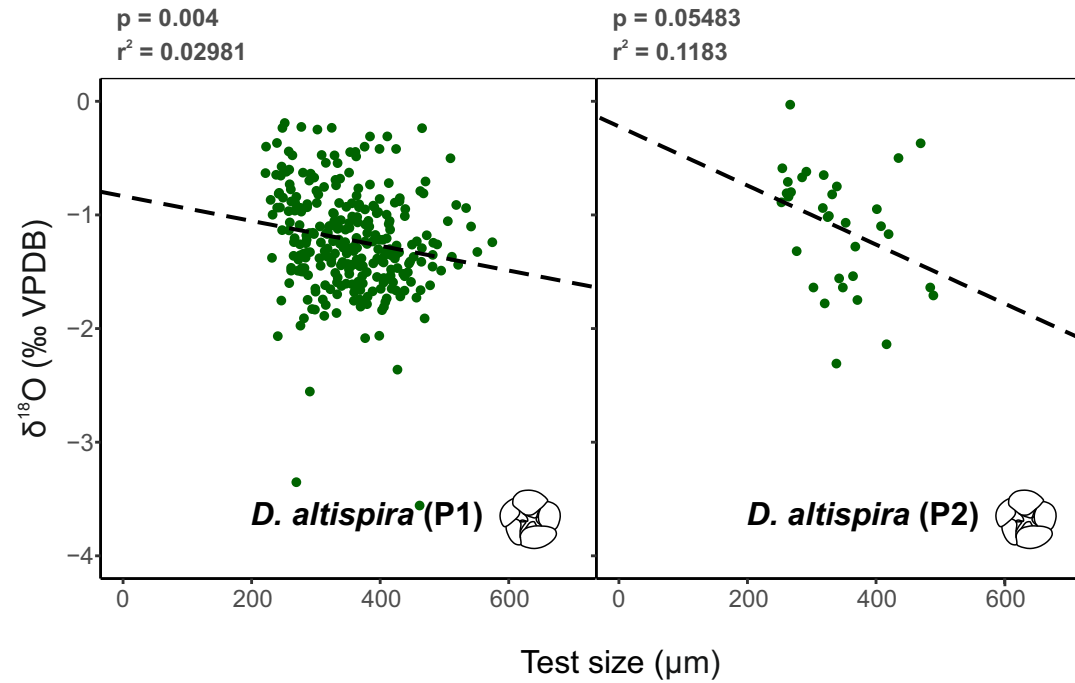

Figure S1. Test size -  $\delta^{18}\text{O}$  relationships for *Dentoglobigerina altispira* during Phase 1 and Phase 2 assigned by Woodhouse et al. (2021). Trend lines for each species represent linear regressions based on the entire per phase dataset (dashed line). Significance ( $p$ ) and measure of fit ( $r^2$ ) were calculated for each linear regression.
