# Supplementary material for: Paleoecology and evolutionary response of planktonic foraminifera to the mid-Pliocene Warm Period and Plio-Pleistocene bipolar ice sheet expansion
Source: Copernicus journal article supplement (doi:10.5194/bg-20-121-2023), 2023-01-09
Supplement: Supplementary file 1 [file TableS1_U1338_Count_Data.xlsx]

## Sheet: Count Data
			5H-3-W-70/73	5H-3-W-76/79	5H-3-W-82/85	5H-3-W-88/91	5H-3-W-94/97	5H-3-W-100/103	5H-3-W-106/109	5H-3-W-112/115	5H-3-W-118/121	5H-3-W-124/127	5H-3-W-130/133	5H-3-W-136/139	5H-3-W-142/145	5H-3-W-148/150	5H-4-W-4/7	5H-4-W-10/13	5H-4-W-16/19	5H-4-W-23/26	5H-4-W-29/32	5H-4-W-35/38	5H-4-W-41/44	5H-4-W-47/50	5H-4-W-53/56	5H-4-W-59/62	5H-4-W-65/68	5H-4-W-71/74	5H-4-W-77/80	5H-4-W-83/86	5H-4-W-89/92	5H-4-W-95/98	5H-4-W-101/104	5H-4-W-108/111	5H-4-W-114/117	5H-4-W-120/123	5H-4-W-132/135	5H-4-W-143/146	5H-5-W-6/9	5H-5-W-18/21	5H-5-W-30/33	5H-5-W-43/46	5H-5-W-55/58	5H-5-W-63/66	5H-5-W-77/80	5H-5-W-91/94	5H-5-W-105/108	5H-5-W-119/122	5H-5-W-134/137
		U1338
		Other Data
		Depth (cm)	3490	3496	3502	3508	3514	3520	3526	3532	3538	3544	3550	3556	3562	3568	3574	3580	3586	3593	3599	3605	3611	3617	3623	3629	3635	3641	3647	3653	3659	3665	3671	3678	3684	3690	3702	3713	3726	3738	3750	3763	3775	3783	3797	3811	3825	3839	3854
		Age (Mag)	2.999	3.005	3.008	3.011	3.014	3.017	3.02	3.023	3.026	3.029	3.032	3.035	3.038	3.041	3.044	3.047	3.05	3.053	3.056	3.059	3.062	3.065	3.068	3.071	3.074	3.077	3.08	3.083	3.086	3.089	3.092	3.095	3.098	3.101	3.107	3.113	3.12	3.129	3.138	3.148	3.156	3.162	3.173	3.183	3.193	3.204	3.212
		Age (LRO4)	2975.01	2982.86	2988.2	2993.54	2998.88	3004.22	3009.56	3014.9	3028.6	3033.17	3037.74	3042.31	3046.88	3051.45	3053.65	3055.84	3058.04	3060.6	3062.8	3065.64	3068.48	3071.32	3074.16	3077.95	3084.26	3090.56	3096.87	3104.44	3113.91	3123.37	3128.61	3134.72	3135.58	3136.44	3138.17	3139.75	3141.61	3143.34	3145.06	3167.21	3187.66	3194.58	3206.7	3218.81	3230.48	3231.58	3232.77
		PF Frag. Index
		Split	16	8	16	8	8	8	8	4	8	8	16	16	16	8	4	4	4	2	1	4	2	8	2	8	16	8	8	16	8	16	8	16	4	2	4	2	4	4	2	8	8	8	4	4	8	8	16
	Ecogroup	Species
	4	Beella digitata																																									1
(?)	4	Beella megastoma					1
		Biserial sp. 1																			2	2	+
		Candeina nitida														1	1		1										1			1
(?)	4	Catapsydrax unicavus																								+
	1	Dentoglobigerina altispira											2	+	2	+	1	5	1	3	1	7	1	2	5	13	4	11	19	12	5	6	8	6	3	7	5	0	6	7	5	3	2	4	3	6	13	4	5
	3	Dentoglobigerina baroemoenensis													2			4	2	2		1		1	3	4	3	3	5	4	2	2	5	2	2	4	2		1	2	2	1	1	2	2	1	3	4	3
	3	Dentoglobigerina globosa													2			1	5	2	2	3	2	1	10	7	8	6	8	5	5	3	5	4	3		1		3	7	1	4		3	3	1	6	5	5
	4	Dentoglobigerina venezuelana	1		+				1	1	1		4		+										1	+	1		1	2	+	2			+	1	1		+	2	1	1				1	2	1	3
		Galietella vivans
	2	Globigerina bulloides	22	36	29	40	28	16	19	21	24	18	8	25	7	17	18	24	5	8	6	9	15	10	15	15	16	22	17	34	17	42	30	24	41	14	35	5	22	23	12	15	16	19	24	11	20	5	32
	1	Globigerina druryi														2				1	1		1	1
	1	Globigerina falconensis		1		1					1	8	2			1	1	1	1	1	2		1	1	2	1	1	1	1	2	2	1	1						1										1
		Globigerina sp.1																1	1	2	1	3	1	1	2		1		2	3	1
	1	Globigerina umbilicata																																	1
	3	Globigerinella calida						1			1			2	1											+					1	1	1											+					+
	3	Globigerinella obesa		1			1		1	2									1	1		3	3	2	1	4		1	1	1		6	2		1				1	+		1	1	2	+		2		3
	3	Globigerinella siphonifera	3	1	1	5	2	3	5	2	5	5				2		1	3	2	1	2	1	1	5	5	1	2	6	1	2	3	1	+	+	1	3	2	3	5	2	1	1	1	2	1	1	+	2
		Globigerinella spp.										1				1
		Globigerinita glutinata	77	68	67	77	87	43	53	82	82	98	73	85	48	64	74	73	37	56	68	66	62	53	84	53	52	67	82	71	73	56	106	76	86	51	66	19	67	65	58	62	53	48	69	51	53	46	55
		Globigerinita uvula										1						1							1								1
	1	Globigerinoides bollii																										2	2	2		1	4	2		2								1
	1	Globigerinoides conglobatus	2					3	1						3							+								1			1		1						1	2	+	1		+			1
	1	Globigerinoides elongatus	2	4	2	1	1			1		1	2		3	5		2	1	1	2	2	6	5	1	1		4	4	1		1		1	1			1						1	1
	1	Globigerinoides eoconglobatus	1		1	1	3					2	2			1		1	2	6			1		2									1		2	3	+			1		1	2	1		2	1	1
	1	Globigerinoides extremus	1			+	1	1			6	+	2		3		1		1	1		1	3	1	3		1	2	1	6	2	2	1	1	2		1			1		+			1	+		1
	1	Globigerinoides obliquus	8	4	5	11	13	5	5	14	13	7	7	7	12	6	1	9	12	18	10	11	6	10	10	5	8	5	13	28	12	14	11	23	9	8	26	12	10	13	7	13	14	28	24	14	19	5	17
	1	Globigerinoides ruber	22	19	24	16	23	27	20	28	40	26	8	5	16	12	19	27	16	26	10	22	31	22	22	20	8	11	30	20	16	14	19	33	24	14	12	15	27	27	18	20	26	12	26	12	25	15	20
	1	Globigerinoides seigeli										2
	1	Globigerinoidesella fistulosa	1			1	+	1		2	6	+	+	2	+	4	1	1	2	2				+		1
	1	Globigerinoidesella fistulosa (cockscomb)																								+	+				+	+	+		+		+	+							+			+
	3	Globoconella cf. inflata														1
	3	Globoconella cf. puncticulata					1			1										1							+	2	2	1							+	1	2			7	4	9	3	+	11	2
	3	Globoconella inflata										+		2	4											+				1	1								+			1	+
	3	Globoconella puncticulata									2	17
	3	Globoquadrina conglomerata	1		+	1	5	4	1	7	1	1	1		2	6	3	2	3	8	5		1	1	7	5	1	2	2	2		3	3	6	5	9	3		3	3	5	1		1	3	+	3		2
	3	Globorotalia menardii							1									1	1		1	1	2	2													1		1		1			1					1
	3	Globorotalia tumida	42	55	74	90	70	57	61	72	53	63	60	40	25	67	27	51	81	53	79	82	71	56	78	53	37	84	43	45	58	79	89	58	82	115	70	100	55	56	69	31	34	61	78	90	91	65	57
	3	Globorotalia ungulata																						1	2	+			1							1
	4	Globorotaloides cf. suteri													1
	4	Globorotaloides hexagonus	+	3	1	5	5	3	3	6	3	10	15	14	16	3	5	2	4	12	6	2	3	5	10	5	1	5	3	4	4	3	8	10	7	4	14	4	6	10	7	5	10	6	5	7	9	7	4
		Globorotaloides spp.										1	3		2			1																														+
		Globorotaloides sp.1	3	4	2	1	2	2	7	2	4		1	8				1		1				+		+	+		2	+		3	1	1				1	1	3		4					1		+
	1	Globoturborotalita apertura	8	2	4	2	5	3	1	4	3	9	+	2	4	4		7	5	4	3	1		9	2	9	2	3	5	8	4	4	3	3	2	9	3	+	3	2	+	1	1	3	8	4	2		4
	1	Globoturborotalita cf. connecta											1
	2	Globoturborotalita decoraperta	1	2							1										2	3	2	1	3	3	1	1	1	6			2	1	2	1	+		3	2	1			1		+	1
	2	Globoturborotalita rubescens	1	1	1	1	1			2		2	4	6	3	2	4	5	3	2		1	2	2	3		1	+	1	1		3	3	2	1	1			1	1					1
	2	Globoturborotalita tenella	1		1											1									1
	1	Globoturborotalita woodi	24	19	10	13	17	9	13	16	14	17	14	15	17	13	26	31	26	32	16	12	23	29	30	39	34	37	51	53	37	22	44	36	24	33	37	16	21	43	33	26	44	33	42	25	37	21	33
	4	Hirsutella scitula	2		4	+	2		3	2	3	3			2		1	4		1	3	1	4	3	2	1	3	6		1	1	6	6	2	7	3	+	2	+	1	2	1	2	3	2	2	2	2	1
	4	Hirsutella theyeri												1																																			+
	3	Menardella pertenuis
	3	Menardella exilis
	3	Menardella limbata	14	2	13	7	16	7	11	15	12	18	22	9	16	35	10	21	52	12	1	8	4	12	8	9	5	9	+	1	3	3	3	1	1		14	12	15	5	4	5	7	12	13	12	4	8	5
	3	Menardella miocenica						1				1		1	4	3			2																									+				+
	3	Menardella multicamerata		1		+							1			1			1																				+	1
	3	Menardella spp.													1
	3	Neogloboquadrina acostaensis	1	2	4	2	4		8	3	7		1			1		1		10	6	13	6	4	8	15	9	13		9	7	3	4	4	5	1	2	4	3		1	1	1		1	1		2	2
	3	Neogloboquadrina dutertrei	4		6			7	2	3	3		2	1	3																4	17	15	11	11	7	2		3	+		3	4	7	9		8	4	7
	3	Neogloboquadrina humerosa	1	4	1	+			1	1	1	1		7		3	1			1			2	2		2									+		1				+				1				+
	2	Neogloboquadrina incompta	51	43	39	45	42	33	36	50	50	45	27	43	18	37	47	47	25	31	49	28	32	31	29	38	19	30	60	40	44	51	70	47	41	36	51	22	74	65	45	41	34	62	56	34	76	39	74
	5	Neogloboquadrina pachyderma			1	1						1		2		1	2	4	1	1		5		2			2	2	3	4	3		1	3			6	2	3	1	1	1	1	1	2		1	2	1
		Neogloboquadrina spp.			1				1			1			1																	4	1															1
	1	Orbulina suturalis																					1																										+
	1	Orbulina universa	+	3		9	4	5	1	3	3	3	6	10	1	4	1	2	4		4	3	7	2	8	5		1	5	8	2	12	8	6	3	3	1	3	9	3	3	2	3	3	3	4	2
	3	Pulleniatina obliquiloculata													1											+
	3	Pulleniatina praecursor	+		1		1	1			1	1	2			2		+								+	+					1			+					1		+				+			+
	3	Pulleniatina primalis	25	12	16	8	15	17	19	33	44	14	10	19	9	11	5	14	5	7	10	8	7	10	15	4	2	22	28	25	11	20	19	7	13	10	13	6	7	19	11	9	17	11	8	7	33	12	19
	3	Pulleniatina spp.		1	1	1	2	3	2	3	5	6	+			7	8	9	9	7	13	8	8	11	12	7	12	17	13	7	4	3	4	4	7	5	4	5	5	4		1		3		1		1	1
	3	Sphaeroidinella dehiscens	7	2	+	3	6	3	1	8	3	3	6	4	5	3	2	9	8	7	7	7	20	9	10	6	1	8	4	2	4	9	8	5	6	6	5	13	17	17	18	10	5	8	12	8	6	6	4
	3	Sphaeroidinellopsis kochi	1	0	0	2	4	2	2	1	0	0	0	0	0	0	0	0	0	0	0	0	0	0	0	0	0	2	1	0	0	0	7	5	1	1	0	0	0	2	1	4	0	3	5	2	5	5	0
	3	Sphaeroidinellopsis paenedehiscens		1	2	4				1	1	1		1			2	1	1	3	3	5	3		1	1	1	1			3	1	2	1			1	4	2	1		1	1						2
	3	Sphaeroidinellopsis seminulina			2					1													1	1	1	2		1					1	1	1		1	1			2						1
	3	Sphaeroidinellopsis spp.
		Streptochilus globigerum
		Tenuitella angustiumbilicata										1			3
		Tenuitella cf. munda	4	3	1	3	4		3		1	1	1	7	2	6	7	9	4	5	8	4	3	5	7	8	10	8	9	7	14	4	13	7	3		+	2	2	3	4	4	8	2	2	2	4		4
		Tenuitella clemenciae								1									3											2					1		2								1
		Tenuitella compressa	1
		Tenuitella fleisheri												2	3		1			2	2	1			1	1
		Tenuitella iota	0	0	1	0	1	2	3	1	4	1	0	0	2	0	0	0	0	0	0	0	0	0	0	0	0	0	0	0	0	0	0	0	0	0	0	0	0	0	0	0	0	0	0	0	4	1	0
		Tenuitella spp.										3		2	1						1
		Tenuitella sp. (Li, 1987)												1
	1	Trilobatus quadrilobatus	3	6	2	4	6	2	2	4	9	8		7	1	2		5	1	1	2	1	1	3	6	10	3	9	1	8	9	7	5	4	2	4	4	8	4	4	1	4	5	3	2	2	3	1	3
	1	Trilobatus sacculifer		2							2	2	1	2	1	3		2	2	2		3	2	1		2			1	1	1	3		1	1	1	+	1	2	3	1	+	1			1			2
	1	Trilobatus sacculifer-fistulosa					2			4		1		2	3		1		1			+
	1	Trilobatus subsacculifer	2		2	1	2	1		3	1										1	1	1	1	33	2	1	1		3	3	2	8		1	1				1		1		3	1	2	2	1	2
	1	Trilobatus trilobus	13	18	13	19	7	13	12	27	16	18	18	15	14	21	11	14	19	24	20	10	14	18	34	26	25	35	18	17	9	9	22	16	15	19	23	9	18	13	23	19	18	26	24	13	35	22	16
	4	Truncorotalia cf. crassula														1	1	1
	4	Truncorotalia cf. tosaensis																						+					1		+	+	+
	4	Truncorotalia crassula
	4	Truncorotalia sp.1													+																														+			+
	4	Truncorotalia sp.2
	4	Truncorotalia tosaensis		+				+	1		2	+			+	1	2	1	2	3	2	+	1	2		+	3	3	1	1	+	2	+	3	3	6	1												+
	4	Truncorotalia truncatulinoides																		+	1
	4	Truncorotalia viola
	4	Turborotalita cristata	2
	4	Turborotalita clarkei	32	30	21	15	31	20	12	13	28	13	18	15	5	4	7	14		2	11	5		11	18	2	9	8	24	20	12	11	16	13	22	19	7	9	23	13	20	27	21	12	18	18	25	5	20
	4	Turborotalita humilis	4	9	1		1	2	2				2	4		4			2			2	1	1	3		6	5	2	14	4	3	3	1	5	2	1	1	3	4	1	1		2	1	+			3
	4	Turborotalita sp. 1	1	3							1
	5	Turborotalita quinqueloba	4		3	1	2	1				7	3	5	5	2	7	7	2	5	5	3	1	7	1	3	7	1	3	1		4	1	2	1		2					1		2	4		1		5
			-	-	-	-	-	-	-	-	-	-	-	-	-	-	-	-	-	-	-	-	-	-	-	-	-	-	-	-	-	-	-	-	-	-	-	-	-	-	-	-	-	-	-	-	-	-	-
												100	100	100	100	100	100	100	100	100	100	100	100	100	100	100	100	100	100	100	100	100	100	100	100	100	100	100	100	100	100	100	100	100	100	100	100	100	100
		Total PF	393	362	357	391	418	298	314	440	457	442	329	373	274	365	298	417	358	369	367	350	357	353	500	387	299	453	478	485	380	447	566	434	447	401	424	280	427	433	362	335	337	402	461	333	513	294	420
		100/total PF	0	0	0	0	0	0	0	0	0	0.226244	0.303951	0.268097	0.364964	0.273973	0.33557	0.239808	0.27933	0.271003	0.27248	0.285714	0.280112	0.283286	0.2	0.258398	0.334448	0.220751	0.209205	0.206186	0.263158	0.223714	0.176678	0.230415	0.223714	0.249377	0.235849	0.357143	0.234192	0.230947	0.276243	0.298507	0.296736	0.248756	0.21692	0.3003	0.194932	0.340136	0.238095
		No. 1	87	78	63	79	84	70	55	106	114	104	65	67	80	78	63	107	94	122	72	74	99	105	158	134	87	122	151	170	102	98	135	133	89	103	115	65	101	117	93	91	115	120	136	83	140	71	105
		No. 2	76	82	70	86	71	49	55	73	75	65	39	74	28	57	69	76	33	41	57	41	51	44	51	56	37	53	79	81	61	96	105	74	85	52	86	27	100	91	58	56	50	82	81	45	97	44	106
		No. 3	99	82	121	123	127	106	115	153	139	131	105	86	75	142	58	115	174	116	128	141	131	114	161	124	80	173	114	104	105	154	169	109	138	160	123	148	121	123	117	81	76	124	140	124	174	114	113
		No. 4	42	45	27	20	40	25	22	22	38	26	39	34	24	13	16	22	8	18	23	10	9	22	34	8	23	27	32	42	21	27	33	29	44	35	24	16	32	30	31	35	34	23	26	28	38	15	31
		No. 5	4	0	4	2	2	1	0	0	0	8	3	7	5	3	9	11	3	6	5	8	1	9	1	3	9	3	6	5	3	4	2	5	1	0	8	2	3	1	1	2	1	3	6	0	2	2	6
		glutinata	77	68	67	77	87	43	53	82	82	98	73	85	48	64	74	73	37	56	68	66	62	53	84	53	52	67	82	71	73	56	106	76	86	51	66	19	67	65	58	62	53	48	69	51	53	46	55
		Ecogroup 1%	22.1374	21.547	17.6471	20.2046	20.0957	23.4899	17.5159	24.0909	24.9453	23.5294	19.7568	17.9625	29.1971	21.3699	21.1409	25.6595	26.257	33.0623	19.6185	21.1429	27.7311	29.745	31.6	34.6253	29.097	26.9316	31.59	35.0515	26.8421	21.9239	23.8516	30.6452	19.9105	25.6858	27.1226	23.2143	23.6534	27.0208	25.6906	27.1642	34.1246	29.8507	29.5011	24.9249	27.2904	24.1497	25
		Ecogroup 2%	19.3384	22.6519	19.6078	21.9949	16.9856	16.443	17.5159	16.5909	16.4114	14.7059	11.8541	19.8391	10.219	15.6164	23.1544	18.2254	9.21788	11.1111	15.5313	11.7143	14.2857	12.4646	10.2	14.4703	12.3746	11.6998	16.5272	16.701	16.0526	21.4765	18.5512	17.0507	19.0157	12.9676	20.283	9.64286	23.4192	21.0162	16.0221	16.7164	14.8368	20.398	17.5705	13.5135	18.9084	14.966	25.2381
		Ecogroup 3%	25.1908	22.6519	33.8936	31.4578	30.3828	35.5705	36.6242	34.7727	30.4158	29.638	31.9149	23.0563	27.3723	38.9041	19.4631	27.5779	48.6034	31.4363	34.8774	40.2857	36.6947	32.2946	32.2	32.0413	26.7559	38.1898	23.8494	21.4433	27.6316	34.4519	29.8587	25.1152	30.8725	39.9002	29.0094	52.8571	28.3372	28.4065	32.3204	24.1791	22.5519	30.8458	30.3688	37.2372	33.9181	38.7755	26.9048
		Ecogroup 4%	10.687	12.4309	7.56303	5.11509	9.56938	8.38926	7.00637	5	8.3151	5.88235	11.8541	9.11528	8.75912	3.56164	5.36913	5.27578	2.23464	4.87805	6.26703	2.85714	2.52101	6.23229	6.8	2.06718	7.69231	5.96026	6.69456	8.65979	5.52632	6.04027	5.83039	6.68203	9.8434	8.72818	5.66038	5.71429	7.49415	6.92841	8.56354	10.4478	10.089	5.72139	5.63991	8.40841	7.40741	5.10204	7.38095
		Ecogroup 5%	1.01781	0	1.12045	0.511509	0.478469	0.33557	0	0	0	1.80995	0.911854	1.87668	1.82482	0.821918	3.02013	2.63789	0.837989	1.62602	1.3624	2.28571	0.280112	2.54958	0.2	0.775194	3.01003	0.662252	1.25523	1.03093	0.789474	0.894855	0.353357	1.15207	0.223714	0	1.88679	0.714286	0.702576	0.230947	0.276243	0.597015	0.296736	0.746269	1.30152	0	0.389864	0.680272	1.42857
		G. glutinata%	19.5929	18.7845	18.7675	19.6931	20.8134	14.4295	16.879	18.6364	17.9431	22.1719	22.1884	22.7882	17.5182	17.5342	24.8322	17.506	10.3352	15.1762	18.5286	18.8571	17.3669	15.0142	16.8	13.6951	17.3913	14.7903	17.1548	14.6392	19.2105	12.528	18.7279	17.5115	19.2394	12.7182	15.566	6.78571	15.6909	15.0115	16.0221	18.5075	15.727	11.9403	14.9675	15.3153	10.3314	15.6463	13.0952
		1+2%	41.4758	44.1989	37.2549	42.1995	37.0813	39.9329	35.0318	40.6818	41.3567	38.2353	31.6109	37.8016	39.4161	36.9863	44.2953	43.8849	35.4749	44.1734	35.1499	32.8571	42.0168	42.2096	41.8	49.0956	41.4716	38.6313	48.1172	51.7526	42.8947	43.4004	42.4028	47.6959	38.9262	38.6534	47.4057	32.8571	47.0726	48.037	41.7127	43.8806	48.9614	50.2488	47.0716	38.4384	46.1988	39.1156	50.2381
		3+4%	35.8779	35.0829	41.4566	36.5729	39.9522	43.9597	43.6306	39.7727	38.7309	35.5204	43.769	32.1716	36.1314	42.4658	24.8322	32.8537	50.838	36.3144	41.1444	43.1429	39.2157	38.5269	39	34.1085	34.4482	44.1501	30.5439	30.1031	33.1579	40.4922	35.689	31.7972	40.7159	48.6284	34.6698	58.5714	35.8314	35.3349	40.884	34.6269	32.6409	36.5672	36.0087	45.6456	41.3255	43.8776	34.2857

[truncated: 30 more columns]
