# Supplementary material for: Paleoecology and evolutionary response of planktonic foraminifera to the mid-Pliocene Warm Period and Plio-Pleistocene bipolar ice sheet expansion
Source: Copernicus journal article supplement (doi:10.5194/bg-20-121-2023), 2023-01-09
Supplement: Supplementary file 2 [file bg-20-121-2023-supplement.zip]

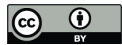

*Supplement of*

**Paleoecology and evolutionary response of planktonic foraminifera to the mid-Pliocene Warm Period and Plio-Pleistocene bipolar ice sheet expansion**

**Adam Woodhouse et al.**

*Correspondence to:* Adam Woodhouse ([adam.woodhouse@austin.utexas.edu](mailto:adam.woodhouse@austin.utexas.edu))

- [bg-20-121-2023-supplement-title-page.pdf](#)
- [Figure\\_S1\\_NEW.pdf](#)
- [TableS1\\_U1338\\_Count\\_Data.xlsx](#)
- [TableS2\\_All Species\\_Isotope\\_Data.xlsx](#)
- [TableS3\\_Dentoglobigerina\\_Carbon\\_Isotope\\_v\\_size.xlsx](#)
- [TableS4\\_Dentoglobigerina\\_Oxygen\\_Isotope\\_v\\_size.xlsx](#)
- [TableS5\\_D.altispira\\_Phase\\_Isotope\\_v\\_size.xlsx](#)

The copyright of individual parts of the supplement might differ from the article licence.
