# Supplementary material for: Paleoecology and evolutionary response of planktonic foraminifera to the mid-Pliocene Warm Period and Plio-Pleistocene bipolar ice sheet expansion
Source: Copernicus journal article supplement (doi:10.5194/bg-20-121-2023), 2023-01-09
Supplement: Supplementary file 2 [file TableS2_All Species_Isotope_Data.xlsx]

## Sheet: Species Isotopes
Expedition	Site	Hole	Core	Core Type	Section	Section Half	Top Interval (cm)	Depth	Age	C.wuellerstorfi		G. scitula		G. tumida			N. incompta		G. ruber		D. altsipira		D. baroemoenensis		D. globosa
							(cm)	(cmbsf)	(ka)	δ13C ‰ VPDB	δ18O ‰ VPDB	δ13C ‰ VPDB	δ18O ‰ VPDB	δ13C ‰ VPDB	Corrected δ13C ‰ VPDB	δ18O ‰ VPDB	δ13C ‰ VPDB	δ18O ‰ VPDB	δ13C ‰ VPDB	δ18O ‰ VPDB	δ13C ‰ VPDB	δ18O ‰ VPDB	δ13C ‰ VPDB	δ18O ‰ VPDB	δ13C ‰ VPDB	δ18O ‰ VPDB
320	U1338	A	5	H	3	W	70	3490	2975.01	-0.440986	3.00994	0.0131753	2.17925	0.990508	-0.00949205	-0.210602	0.884695	-1.16469	1.553	-1.83372
320	U1338	A	5	H	3	W	76	3496	2982.86	-0.203385	2.72476	-0.231779	2.10803	1.23846	0.238459	0.232822	0.919438	-0.960387	1.69667	-1.58403
320	U1338	A	5	H	3	W	82	3502	2988.2	-0.186862	3.01985	-0.10028	1.88417	1.20779	0.207792	0.139906	0.83196	-1.12443	1.24919	-1.35438
320	U1338	A	5	H	3	W	88	3508	2993.54	-0.168599	3.1019			1.34688	0.346883	-0.0742897	0.832427	-0.712009	1.4587	-1.40841
320	U1338	A	5	H	3	W	94	3514	2998.88	-0.182882	2.6576	-0.601068	2.39465	1.34039	0.340386	0.511571	0.665218	-1.06134	0.657384	-1.65695
320	U1338	A	5	H	3	W	100	3520	3004.22	-0.222497	3.14876	-0.217106	2.40361	1.21393	0.213933	0.874062	1.23602	-1.07029	1.65006	-1.32096
320	U1338	A	5	H	3	W	106	3526	3009.56	-0.314902	2.93496	-0.250885	2.47986	1.47354	0.473538	0.125519	0.734998	-0.881207	1.92737	-1.6839
320	U1338	A	5	H	3	W	112	3532	3014.9	-0.531378	2.73058			1.21937	0.219368	-0.565033	0.650247	-1.06967	1.33809	-1.97699
320	U1338	A	5	H	3	W	118	3538	3028.6	-0.307883	3.00336	-0.559904	2.04782	1.2733	0.2733	0.220496	0.863872	-1.0679	1.5685	-1.57898
320	U1338	A	5	H	3	W	124	3544	3033.17	-0.42304	2.74709	-0.311354	2.06126	1.41978	0.419784	0.66695	0.7095	-0.866697	1.73918	-1.55537
320	U1338	A	5	H	3	W	130	3550	3037.74	-0.232782	2.71164	-0.283924	2.11809	1.24037	0.240365	0.930722	0.58005	-0.901444	1.98734	-1.91945	1.52496	-0.994906	1.17194	-1.27754	2.62762	-1.64287
320	U1338	A	5	H	3	W	136	3556	3042.31	-0.119959	2.6117	-0.362079	2.30322	1.32598	0.325976	0.0590403	0.719278	-0.882375	1.90674	-1.61572	1.25397	-1.05051	2.92444	-1.92106	1.61643	-1.32672
320	U1338	A	5	H	3	W	142	3562	3046.88	-0.202026	2.66686	-0.0595691	2.1418	1.25976	0.259764	0.215142	1.25465	-1.21955	1.82851	-1.82707	1.60636	-1.29082	2.13381	-1.65274	1.62141	-1.37793
320	U1338	A	5	H	3	W	148	3568	3051.45	-0.389828	2.76341	-0.361927	2.67565	1.0786	0.0785993	0.777896	0.606775	-0.599784	1.88745	-1.68681	0.890465	-0.680785	1.60318	-1.88939	1.40637	-1.32236
320	U1338	A	5	H	4	W	4	3574	3053.65	-0.280965	2.82734			1.32552	0.325516	0.617515	0.532132	-0.58209	1.82707	-1.70745	1.18771	-1.19788
320	U1338	A	5	H	4	W	10	3580	3055.84	-0.166904	2.6655	-0.0963392	2.07189	1.36059	0.360587	-0.00746437	0.777007	-0.577972	1.54468	-1.88254	1.21047	-1.18688	2.14924	-1.50817
320	U1338	A	5	H	4	W	16	3586	3058.04	-5.27164e-05	2.66628	-0.0909862	2.32339	1.29202	0.292022	1.00029	0.846706	-0.702103	1.57907	-2.04053	0.978779	-0.811475	2.01117	-1.72209
320	U1338	A	5	H	4	W	23	3593	3060.6	0.127523	2.6304			1.49927	0.499275	0.290075	0.74851	-0.528991	2.09058	-1.6867	1.6287	-1.10852	2.03442	-1.27176
320	U1338	A	5	H	4	W	29	3599	3062.8	-0.207476	2.45953			1.50362	0.503621	-1.27823	0.984422	-1.2398	2.20013	-1.96032
320	U1338	A	5	H	4	W	35	3605	3065.64	-0.12374	2.66803	-0.10656	1.46195	1.3738	0.373801	0.893793	1.16514	-0.93399	2.7839	-2.01849	1.70092	-1.41346	1.61635	-1.43641	2.8375	-1.50684
320	U1338	A	5	H	4	W	41	3611	3068.48	0.0255128	2.69848	-0.34722	1.81324	1.46332	0.463324	0.609072	1.36508	-1.11846	1.59576	-1.65721	1.7711	-1.8588
320	U1338	A	5	H	4	W	47	3617	3071.32	0.0569913	2.50111	0.0991532	2.19332	1.25166	0.251656	-0.816196	0.990405	-0.988993	1.4075	-2.02765	1.67435	-1.50828	2.12405	-1.33175
320	U1338	A	5	H	4	W	53	3623	3074.16	-0.096442	2.57224	-0.0287271	2.23937	1.52176	0.521764	-0.0558549	1.05968	-1.11926	1.43165	-1.96119	2.20294	-1.54725	2.06434	-1.46393
320	U1338	A	5	H	4	W	59	3629	3077.95	0.16447	2.74254	2.38333e-05	2.2128	1.596	0.596001	-0.441287	0.66199	-0.724924	1.48984	-1.51515	2.15174	-1.69056	2.22429	-1.53477
320	U1338	A	5	H	4	W	65	3635	3084.26	0.041956	2.64516	0.29467	1.34756	1.39207	0.392066	-0.329039	0.932365	-0.99431	1.34282	-1.53211	1.5661	-1.32521	2.29357	-1.55026
320	U1338	A	5	H	4	W	71	3641	3090.56	-0.0879011	2.61124	-0.054554	2.5606	1.43102	0.43102	0.825798	1.02083	-1.12191	1.76209	-1.81976	1.96676	-1.25876	2.04877	-1.46311
320	U1338	A	5	H	4	W	77	3647	3096.87	0.182797	2.67687	-0.0466636	2.34842	1.28792	0.287922	0.606699	0.702015	-1.27089	1.54059	-1.65019	1.55629	-1.38857	2.18786	-1.45987
320	U1338	A	5	H	4	W	83	3653	3104.44	-0.801431	2.62131	-0.494823	2.4332	1.60692	0.606916	0.00340197	0.62282	-0.736241	1.19049	-1.78939	1.98758	-1.30958	2.04122	-1.21577
320	U1338	A	5	H	4	W	89	3659	3113.91	-0.391258	2.72425			1.34408	0.34408	0.359549	0.474751	-0.0901229	1.58345	-1.992	1.92202	-0.945737	1.39076	-0.808455
320	U1338	A	5	H	4	W	95	3665	3123.37	-0.658408	2.98154	-0.287735	2.30209	1.29268	0.292684	1.09556	0.345425	-0.614813	1.18788	-1.3506	1.40783	-1.50338	1.6008	-0.650906
320	U1338	A	5	H	4	W	101	3671	3128.61	-0.272583	2.75032			1.09765	0.0976466	0.387006	0.548503	-0.713827	1.14196	-1.26166	1.10135	-0.675802	2.08268	-1.00007
320	U1338	A	5	H	4	W	108	3678	3134.72	-0.497367	2.81672	0.0513743	0.756628	1.31532	0.315324	0.248863	0.739969	-0.762739	0.667728	-1.74473	1.34743	-0.753351	1.7803	-1.27745
320	U1338	A	5	H	4	W	114	3684	3135.58	-0.336753	2.81217	-0.467635	1.42682	1.16975	0.169753	0.733801	0.383678	-0.482778	1.00044	-1.65176	1.59207	-1.08402	1.66171	-1.80972
320	U1338	A	5	H	4	W	120	3690	3136.44	-0.410566	2.75602			1.41312	0.41312	-0.246673	0.417147	-0.541888	1.24618	-1.53388	1.87498	-1.21944	1.95453	-1.60436
320	U1338	A	5	H	4	W	132	3702	3138.17	-0.169402	2.20995	0.215249	1.86908	1.55184	0.551843	0.0784028	0.80517	-0.994803	1.9217	-2.26208	1.48455	-1.26529	1.75998	-1.06528
320	U1338	A	5	H	4	W	143	3713	3139.75	-0.063727	2.36672			1.24795	0.247953	0.589409	0.645393	-1.59731	1.49391	-1.57134			3.4483	-1.01301
320	U1338	A	5	H	5	W	6	3726	3141.61	0.0235846	2.71386	0.39537	2.18198	1.43743	0.437431	-0.167255	0.719414	-0.547789	1.78127	-1.62349	1.86746	-1.17724	1.74785	-0.92971
320	U1338	A	5	H	5	W	18	3738	3143.34	-0.0246327	2.68428	0.226305	2.17861	1.37398	0.373981	0.374359	0.750733	-0.583765	1.92844	-1.91119	2.16034	-1.01825	1.93928	-0.907494
320	U1338	A	5	H	5	W	30	3750	3145.06	0.225043	2.73518			1.30924	0.309243	-0.0757033	0.440149	-0.454927	1.76932	-1.65619	1.25657	-0.987987	2.38029	-1.4073
320	U1338	A	5	H	5	W	43	3763	3167.21	0.273057	2.59963	0.141202	1.75249	1.5965	0.596499	0.673321	1.16351	-0.934095	1.36347	-1.82184	1.96201	-1.28151	2.21684	-0.972276
320	U1338	A	5	H	5	W	55	3775	3187.66	0.450099	2.66526			1.61923	0.619225	0.038903	1.07989	-0.332709	1.94961	-1.39458	2.43468	-1.22467	2.3715	-0.835972
320	U1338	A	5	H	5	W	63	3783	3194.58	0.309099	2.76515	0.215667	2.21082	1.61954	0.619543	-0.496792	0.702026	-0.295555	1.74598	-1.44977	1.93576	-1.16991	2.94135	-1.01939
320	U1338	A	5	H	5	W	77	3797	3206.7	0.326561	2.7353			1.5792	0.579197	0.106814	1.27581	-0.868711	2.1014	-1.43819	2.21933	-1.13076	2.21798	-0.952852
320	U1338	A	5	H	5	W	91	3811	3218.81	0.23146	2.47521			1.84263	0.842628	-0.636303	0.935097	-0.229983	1.9176	-1.45281	1.96798	-1.27738	2.23862	-0.906919
320	U1338	A	5	H	5	W	105	3825	3230.48	0.0424121	2.68328	0.369031	1.36329	1.32242	0.322425	-0.174357	1.06905	0.0236538	1.61239	-1.72551	1.85737	-1.07558	2.50145	-0.907336
320	U1338	A	5	H	5	W	119	3839	3231.58	0.119241	2.36932	0.178488	2.00872	1.27935	0.279353	0.462864	0.956081	-0.533222	2.00366	-1.63443	2.0197	-1.33174	2.25693	-1.22273
320	U1338	A	5	H	5	W	134	3854	3232.77	0.153859	2.69476	0.273922	1.10409	1.40894	0.408937	0.532203	0.756343	0.0831992	1.75631	-1.28313	1.7462	-0.661364	2.71919	-1.13864
320	U1338	A	5	H	5	W	148	3868	3233.87	0.195046	2.58111	0.331805	1.20122	1.53885	0.538851	0.190051	0.978783	-0.0717791	1.41565	-1.48778	1.79332	-0.969225	2.21654	-1.37919
320	U1338	A	5	H	6	W	12	3882	3242.47	-0.056423	2.46616	0.177046	1.05992	1.41859	0.418585	-0.172147	0.461928	0.0210482	1.42329	-1.69502	1.82703	-0.926915	2.39095	-1.02174
320	U1338	A	5	H	6	W	26	3896	3249.24	-0.388049	2.8955	-0.416708	2.66366	1.15538	0.155379	0.747984	0.839241	-0.202881	1.24239	-0.834436	2.01861	-1.06653	2.02356	-0.935396
320	U1338	A	5	H	6	W	40	3910	3256.01	-0.520951	2.72938	-0.133603	2.51587	1.15355	0.153545	0.071072	0.927119	-0.158729	1.31843	-1.34265	1.31478	-1.09913	0.964697	-1.01803
320	U1338	A	5	H	6	W	54	3924	3264.78	-0.324415	2.86418	-0.339939	2.16132	1.27436	0.274358	0.279129	0.309445	-0.0507345	1.19174	-0.986497	1.01267	-1.05338	1.80497	-1.29287
320	U1338	A	5	H	6	W	67	3937	3272.93	0.0371459	2.42956	0.0100866	2.31093	1.43859	0.438585	0.199486	0.518551	-0.064862	1.4374	-1.2246	1.60805	-1.21454	1.51541	-1.29613
320	U1338	A	5	H	6	W	81	3951	3296.75	-0.366181	2.60945	-0.0862092	1.96168	1.56718	0.567183	-0.961589	0.67056	-0.233549	1.79556	-1.71611	2.14879	-1.38195	2.11866	-1.10959
320	U1338	A	5	H	6	W	95	3965	3320.57	0.0710251	2.52257	-0.144913	2.64185	1.47033	0.470326	-0.387834	0.725569	0.133602	0.905956	-1.91857	1.59062	-1.44273	2.22691	-1.23545
320	U1338	A	5	H	6	W	106	3976	3324.14	-0.128049	2.7728	-0.179778	1.83729	1.3354	0.335399	0.798247	0.832318	-0.283655	1.65331	-1.76906	1.62334	-1.02608	2.06245	-1.30834
320	U1338	A	5	H	6	W	119	3989	3328.37	-0.293472	2.80298	-0.176628	2.85122	1.43296	0.432963	0.677614	0.787583	-0.37683	1.6164	-1.53933	1.69883	-0.995695	2.12069	-1.27121
320	U1338	A	5	H	6	W	133	4003	3334.46	-0.0412053	2.44998	-0.036445	2.49793	1.28948	0.289477	0.662326	1.12758	-0.619328	1.83587	-1.94397	1.97461	-1.61654	2.32103	-1.85351
320	U1338	A	5	H	6	W	145	4015	3339.67	-0.0152493	2.43249	-0.624366	0.978891	1.39861	0.398605	-0.0921094	0.94704	-0.810973	1.29572	-1.10167	1.35367	-1.29957	1.90401	-1.6521
320	U1338	A	5	H	7	W	36	4056	3357.5	-0.0314375	2.71525			1.36811	0.368111	0.380762	0.905532	-0.680322	1.53731	-1.76748	2.03565	-1.34225	1.83618	-1.37739
320	U1338	A	5	H	7	W	50	4070	3363.58	0.0118435	2.59218	-0.221734	2.2342	1.51523	0.515234	-0.634937	0.787807	-0.292907	1.5161	-1.39708	1.77648	-1.41749	1.55897	-1.6658
320	U1338	A	5	H	7	W	64	4084	3369.67	0.0424061	2.33002	-0.0768662	2.21644	1.2276	0.227599	0.176505	0.668416	-0.556812	1.49507	-1.94125	1.69198	-1.53489	1.83003	-1.45677
320	U1338	A	5	H	7	W	76	4096	3375.39	-0.134494	2.60939	-0.277771	1.71686	1.08334	0.0833364	0.337157	0.614095	-0.812361	1.46345	-1.48578	1.77315	-1.54744	1.74992	-1.54094
320	U1338	A	5	H	CC	W	11	4111	3382.54	-0.148855	2.60434	-0.0185517	2.03009	1.08908	0.0890794	0.33172	0.335955	-0.693184	1.71476	-1.56843	0.877403	-1.06611	1.85819	-1.19279
320	U1338	A	6	H	1	W	1	4131	3392.08	-0.0171622	2.76266	-0.111979	2.13889	1.29127	0.291274	0.508059	0.710785	-0.405821	1.5244	-1.58121	1.61707	-1.17938	2.00067	-0.953995
320	U1338	A	6	H	1	W	14	4144	3398.28	0.0712063	2.65192	-0.0597752	2.26835	1.20958	0.209583	-0.117659	0.95662	-0.653266	1.67776	-1.3103	1.53678	-1.0331	2.54451	-1.03267
320	U1338	A	6	H	1	W	28	4158	3402.66	0.0491182	2.49024	-0.249059	2.42741	1.33823	0.338227	0.414095	0.592811	-0.576636	1.7792	-1.56411	1.88884	-1.37297	1.89014	-1.26223
320	U1338	A	6	H	1	W	41	4171	3406.73	-0.13389	2.53274	-0.0345755	2.16442	1.00243	0.00242829	0.054262	1.04414	-1.00646	1.71786	-2.00904	1.66295	-1.22569	2.01668	-1.57139
320	U1338	A	6	H	1	W	55	4185	3414.66	0.0891557	2.32946	-0.257779	1.83419	1.13849	0.138489	0.161249	0.787201	-1.0805	1.66847	-2.16331	1.60367	-0.968256	1.95121	-1.37006
320	U1338	A	6	H	1	W	68	4198	3422.03	0.0320232	2.35129	0.0601314	1.9749	1.29448	0.294481	0.0627174	0.674923	-0.805302	1.60005	-1.81864	1.95385	-1.51942	1.98864	-1.34677
320	U1338	A	6	H	1	W	82	4212	3429.97	-0.073245	2.27803	0.212982	1.51056	1.45192	0.451925	-0.194828	0.476341	-0.971533	2.01895	-1.53674	1.99771	-1.29247	2.47784	-1.2351
320	U1338	A	6	H	1	W	96	4226	3437.9	-0.112176	2.7955	0.328364	2.06486	1.45178	0.451782	-0.0725326	0.85608	-0.653465	1.7715	-1.90587	1.44843	-0.968355	1.80306	-0.798033
320	U1338	A	6	H	1	W	109	4239	3445.27	-0.0892682	2.88467	-0.140335	2.15602	1.43832	0.438317	0.312047	0.692066	-0.636725	1.13295	-1.56775	2.06917	-1.61634	2.5593	-1.26473
320	U1338	A	6	H	1	W	123	4253	3453.2	0.375341	2.68036	0.288895	2.15064	1.46714	0.46714	0.119244	1.00278	-1.37392	1.60617	-2.17109	2.39597	-1.00799	2.46901	-1.34676
320	U1338	A	6	H	1	W	137	4267	3457.58	0.0287064	2.51142	0.306132	1.78574	1.61927	0.619271	-0.426065	0.78366	-0.734982	1.94625	-2.0293	2.40527	-1.21161	2.86018	-1.48192
320	U1338	A	6	H	2	W	0	4280	3461.65	-0.0474097	2.70488	0.00131464	2.3751	1.44083	0.440829	0.121804	0.684157	-0.584554	1.66896	-1.83703	2.22031	-1.12086	2.61328	-1.06438
320	U1338	A	6	H	2	W	14	4294	3465.88	0.137454	2.65302	0.276623	2.07276	1.54328	0.543283	-0.333773	0.736737	-0.524676	1.50834	-1.40124	2.56364	-1.4479	2.36113	-1.12624

## Sheet: Species Isotopes Metadata
Data Description
Expedition: Integrated Ocean Drilling Program Expedition Number. See Pälike et al. (2010) for details.
Site: Site number of the IODP Expedition from which samples were sourced
Hole: Hole of the IODP Expedition Site from which samples were sourced
Core: The core number from which samples were sourced
Core Type: The technique used to collect the core, H = Advanced Piston Corer. See Pälike et al. (2010) for Operations details.
Section: The section within the sampled core from which samples were sourced
Section Half: Core section half used, W= Working, A = Archive
Top Interval (cm): The shallowest depth of the ~ 5 cm (20-40cc) sample taken
Depth: The shallowest depth of the ~ 5 cm (20-40cc) sample taken in centimeters below sea floor
Age: Age in ka of the sample after tuning the constructed benthic stable oxygen isotope to the ODP Site 849/IODP Site 1338 stack of Lyle et al. (2019).
C.wuellerstorfi	δ13C ‰ VPDB		Stable carbon isotopes Cibicidoides wuellerstorfi - multiple specimens used in data
	δ18O ‰ VPDB		Stable oxygen isotopes Cibicidoides wuellerstorfi - multiple specimens used in data
G. scitula	δ13C ‰ VPDB		Stable carbon isotopes Hirsutella scitula - multiple specimens used in data
	δ18O ‰ VPDB		Stable oxygen isotopes Hirsutella scitula - multiple specimens used in data
G. tumida	δ13C ‰ VPDB		Stable carbon isotopes Globorotalia tumida - multiple specimens used in data
	Corrected δ13C ‰ VPDB		Corrected stable carbon isotopes Globorotalia tumida - 1‰ substracted from calculated value to account for isotope enrichment from depth occupation within the oxygen minimum zone (Birch et al. 2013)
	δ18O %o VPDB		Stable oxygen isotopes Globorotalia tumida - multiple specimens used in data
N. incompta	δ13C ‰ VPDB		Stable carbon isotopes Neogloboquadrina incompta - multiple specimens used in data
	δ18O ‰ VPDB		Stable oxygen isotopes Neogloboquadrina incompta - multiple specimens used in data
G. ruber	δ13C ‰ VPDB		Stable carbon isotopes Globigerinoides ruber - multiple specimens used in data
	δ18C ‰ VPDB		Stable oxygen isotopes Globigerinoides ruber - multiple specimens used in data
D. altsipira	δ13C ‰ VPDB		Stable carbon isotopes Dentoglobigerina altispira - single specimens used in data, data reported here is mean data from multiple single specimens
	δ18O ‰ VPDB		Stable oxygen isotopes Dentoglobigerina altispira - single specimens used in data, data reported here is mean data from multiple single specimens
D. baroemoenensis	δ13C ‰ VPDB		Stable carbon isotopes Dentoglobigerina baroemoenensis - single specimens used in data, data reported here is mean data from multiple single specimens
	δ18O ‰ VPDB		Stable oxygen isotopes Dentoglobigerina baroemoenensis - single specimens used in data, data reported here is mean data from multiple single specimens
D. globosa	δ13C ‰ VPDB		Stable carbon isotopes Dentoglobigerina globosa - single specimens used in data, data reported here is mean data from multiple single specimens
	δ18O ‰ VPDB		Stable oxygen isotopes Dentoglobigerina globosa - single specimens used in data, data reported here is mean data from multiple single specimens
References
Birch, H., Coxall, H.K., Pearson, P.N., Kroon, D., and O’Regan, M., 2013, Planktonic foraminifera stable isotopes and water column structure: Disentangling ecological signals: Marine Micropaleontology, v. 101, p. 127-145, doi:10.1016/j.marmicro.2013.02.002.
Lyle, M., Joy Drury, A., Tian, J., Wilkens, R., and Westerhold, T., 2019, Late Miocene to Holocene high-resolution eastern equatorial pacific carbonate records: Stratigraphy linked by dissolution and paleoproductivity: Climate of the Past, v. 15, p. 1715–1739, doi:10.5194/cp-15-1715-2019.
Pälike, H., Lyle, M., Nishi, H., Raffi, I., Gamage, K., Klaus, A., and the Expedition 320/321 Scientists., 2010, Site 1338: Proceedings of the Integrated Ocean Drilling Program, Volume 320/321, doi:10.2204/ iodp.proc.320321.101.2010.
