# Supplementary material for: Paleoecology and evolutionary response of planktonic foraminifera to the mid-Pliocene Warm Period and Plio-Pleistocene bipolar ice sheet expansion
Source: Copernicus journal article supplement (doi:10.5194/bg-20-121-2023), 2023-01-09
Supplement: Supplementary file 3 [file TableS3_Dentoglobigerina_Carbon_Isotope_v_size.xlsx]

## Sheet: Size_d13C
D.globosa_Size	D.globosa_U_Axis_Major	D.globosa_L_Axis_Major	d13C_D.globosa	D.baroemoenensis_Size	D.baroemoenensis_U_Axis_Major (µm)	D.baroemoenensis_L_Axis_Major (µm)	d13C_D.baroemoenensis	D.altispira_Size	D.altispira_U_Axis_Major (µm)	D.altispira_L_Axis_Major (µm)	d13C_D.altispira
307.871	307.871	323.066	2.62762	406.638	406.638	451.709	1.63945	415.294	415.294	478.471	2.99606
411.58	411.58	423.535	1.61643	395.426	395.426	432.019	2.52619	437.201	437.201	498.08	2.45469
260.73	260.73	264.31	0.507451	276.133	276.133	311.72	0.876716	397.598	397.598	445.384	2.63152
326.54	326.54	338.79	2.73537	391.396	391.396	426.621	2.17844	434.99	434.99	482.524	2.82392
306.505	306.505	309.381	1.40637	360.124	360.124	395.287	2.0507	419.087	419.087	466.569	2.43248
354.725	354.725	359.161	2.50891	370.346	370.346	404.907	2.10924	438.148	438.148	484.624	1.62793
435.496	435.496	450.316	2.8375	291.415	291.415	325.401	2.00865	466.537	466.537	509.674	2.66882
				417.37	417.37	451.12	3.02779	414.482	414.482	456.514	2.20265
				515.339	515.339	548.811	2.43219	429.634	429.634	467.148	1.91939
				347.06	347.06	380.362	2.32886	468.323	468.323	505.48	2.86865
				434.754	434.754	467.288	2.58401	343.905	343.905	380.789	2.03261
				617.934	617.934	650.363	3.50115	289.494	289.494	325.32	2.05859
				428.073	428.073	460.401	1.42512	423.831	423.831	459.584	3.28277
				325.37	325.37	357.662	2.40342	480.969	480.969	516.674	3.01308
				401.76	401.76	433.987	2.11982	487.907	487.907	522.732	2.78642
				428.636	428.636	460.755	2.31137	317.381	317.381	352.194	0.800719
				371.487	371.487	402.694	3.27739	504.519	504.519	538.428	3.1575
				414.321	414.321	445.4	2.84631	573.865	573.865	607.568	2.81316
				345.99	345.99	376.614	1.42814	355.375	355.375	387.804	1.54584
				401.164	401.164	431.153	2.1612	369.842	369.842	401.958	2.4263
				445.673	445.673	475.606	2.83232	378.597	378.597	410.374	2.11455
				290.305	290.305	320.055	1.7145	366.584	366.584	397.774	3.22598
				316.612	316.612	346.255	1.90335	372.467	372.467	403.637	2.86593
				347.34	347.34	376.926	2.65411	274.257	274.257	305.119	1.12097
				368.212	368.212	397.798	2.47074	421.873	421.873	452.302	2.14789
				328.943	328.943	358.073	1.72742	356.783	356.783	387.174	1.73773
				311.409	311.409	340.015	1.53324	375.391	375.391	405.407	2.29137
				340.549	340.549	369.047	1.96283	486.319	486.319	516.132	2.11404
				436.114	436.114	464.547	3.00188	357.698	357.698	386.961	2.28517
				402.661	402.661	430.882	2.28559	357.8	357.8	385.796	1.99589
				434.58	434.58	462.764	3.1628	517.62	517.62	545.521	2.06982
				481.129	481.129	509.286	2.41965	313.232	313.232	341.008	2.10851
				264.725	264.725	292.643	1.93205	510.825	510.825	538.514	2.55392
				343.143	343.143	370.839	2.76164	464.019	464.019	491.565	2.71531
				309.649	309.649	337.071	1.66107	380.573	380.573	407.256	1.14097
				328.583	328.583	355.867	1.49065	368.482	368.482	394.831	2.18257
				321.487	321.487	348.681	2.08711	351.775	351.775	377.921	1.87996
				424.999	424.999	451.938	2.34143	323.137	323.137	348.97	1.96913
				459.683	459.683	486.434	2.98224	311.844	311.844	337.605	2.54643
				391.676	391.676	418.188	3.39964	416.461	416.461	442.194	2.23659
				352.825	352.825	379.246	2.56812	306.178	306.178	331.74	1.36078
				391.483	391.483	417.741	2.941	401.949	401.949	427.487	2.57988
				418.923	418.923	445.093	2.19816	361.564	361.564	387.065	1.4145
				482.775	482.775	508.697	2.87174	284.308	284.308	309.757	2.06094
				284.544	284.544	310.465	2.22747	279.435	279.435	304.862	1.49978
				443.439	443.439	469.323	2.87995	460.504	460.504	485.76	1.34792
				293.328	293.328	318.925	1.62747	425.968	425.968	451.065	3.52701
				306.952	306.952	332.051	2.52051	398.216	398.216	423.11	1.55644
				337.228	337.228	362.057	2.97249	412.355	412.355	437.157	2.60155
				363.497	363.497	388.067	2.46983	443.947	443.947	468.665	3.12582
				380.758	380.758	405.119	1.91374	290.823	290.823	315.307	0.45767
				395.695	395.695	419.837	3.21577	314.586	314.586	338.983	1.72467
				478.678	478.678	502.711	2.98223	436.914	436.914	461.263	3.07249
				364.377	364.377	388.332	2.45409	407.052	407.052	431.196	2.41534
				513.491	513.491	537.426	2.6271	387.175	387.175	410.754	2.57727
				348.082	348.082	371.871	1.96854	334.042	334.042	357.604	1.88638
				341.469	341.469	365.173	2.07219	508.662	508.662	532.11	2.0734
				314.334	314.334	337.929	2.64472	366.213	366.213	389.656	1.44454
				388.768	388.768	412.029	2.75318	316.59	316.59	339.94	1.79763
				350.793	350.793	373.823	1.40648	494.085	494.085	517.069	2.60619
				508.737	508.737	531.583	3.43974	328.542	328.542	351.512	1.8753
				294.97	294.97	317.607	1.2571	395.783	395.783	418.732	1.13719
				352.956	352.956	374.487	3.00933	471.297	471.297	494.226	0.500125
				332.752	332.752	354.122	2.5736	404.851	404.851	427.592	2.12098
				407.332	407.332	428.584	2.19655	312.505	312.505	334.899	2.06799
				441.088	441.088	462.1	0.904236	294.061	294.061	315.903	1.41502
				311.163	311.163	332.15	1.81305	340.401	340.401	362.234	1.50756
				436.004	436.004	456.987	2.89634	259.699	259.699	281.388	0.761136
				409.574	409.574	430.252	3.02358	318.389	318.389	339.987	0.828
				286.123	286.123	306.62	1.5499	321.381	321.381	342.552	2.03806
				297.166	297.166	317.651	1.86606	371.046	371.046	391.835	2.67922
				357.271	357.271	377.461	3.05644	375.871	375.871	396.597	2.07976
				405.241	405.241	425.393	3.11166	358.441	358.441	378.821	2.22128
				409.201	409.201	428.794	2.71701	319.965	319.965	340.207	2.41916
				279.474	279.474	298.956	2.38267	344.402	344.402	364.28	2.1959
				413.486	413.486	432.927	2.78488	375.376	375.376	395.124	2.10365
				272.707	272.707	292.133	0.989068	332.615	332.615	352.346	0.935142
				302.682	302.682	322.056	1.06869	325.615	325.615	345.342	2.07196
				332.765	332.765	352.118	2.01945	301.17	301.17	320.885	1.07883
				426.302	426.302	445.541	2.19583	469.695	469.695	489.285	2.7272
				393.92	393.92	413.145	1.72455	257.187	257.187	276.682	1.1045
				295.28	295.28	314.429	0.793075	481.826	481.826	501.27	2.48308
				295.782	295.782	314.925	2.09706	278.592	278.592	297.96	1.76964
				358.673	358.673	377.532	2.22013	260.202	260.202	279.482	1.15096
				364.533	364.533	383.362	2.44006	409.19	409.19	428.416	2.33466
				369.309	369.309	388.092	2.09971	371.982	371.982	391.015	2.14155
				448.34	448.34	467.096	1.43964	383.133	383.133	402.066	1.58548
				419.68	419.68	438.398	2.77521	451.233	451.233	469.976	3.34785
				300.799	300.799	319.444	1.11189	282.719	282.719	301.19	1.85877
				359.241	359.241	377.718	1.89769	220.178	220.178	238.598	0.661182
				369.733	369.733	388.174	2.11199	480.694	480.694	498.962	2.69566
				343.257	343.257	361.605	2.41956	357.977	357.977	375.98	2.28405
				363.054	363.054	381.3	2.59938	448.647	448.647	466.591	2.66521
				401.205	401.205	419.448	2.6651	292.837	292.837	310.67	1.73567
				337.597	337.597	355.823	2.72429	410.114	410.114	427.825	0.693697
				334.319	334.319	352.493	1.73061	360.412	360.412	378.12	1.27708
				275.171	275.171	293.312	0.743958	491.192	491.192	508.855	2.73537
				346.33	346.33	364.415	1.29252	461.542	461.542	479.177	1.64277
				463.08	463.08	480.959	2.6573	338.916	338.916	356.389	1.81944
				353.063	353.063	370.914	1.14664	322.81	322.81	340.275	1.95507
				533.002	533.002	550.73	3.1337	418.025	418.025	435.31	2.94514
				472.983	472.983	490.585	1.62226	344.868	344.868	362.148	1.86585
				336.933	336.933	354.513	1.53151	334.582	334.582	351.801	2.18321
				363.091	363.091	380.67	1.33279	352.176	352.176	368.815	0.562964
				455.32	455.32	472.871	3.4483	230.274	230.274	246.838	1.18751
				372.757	372.757	390.29	2.27211	350.322	350.322	366.847	2.65589
				298.405	298.405	315.797	2.11967	276.739	276.739	293.191	1.31062
				468.263	468.263	485.571	1.85764	413.874	413.874	430.288	2.12193
				327.339	327.339	344.548	1.6805	325.934	325.934	342.08	1.59868
				384.934	384.934	402.05	2.39338	550.496	550.496	566.598	3.29111
				375.783	375.783	392.631	1.43399	337.805	337.805	353.8	2.50866
				448.586	448.586	465.429	2.27742	393.668	393.668	409.562	2.19107
				284.819	284.819	301.638	1.67008	463.188	463.188	478.909	2.75051
				470.82	470.82	487.588	2.04126	364.964	364.964	380.448	1.80667
				396.34	396.34	413.104	2.83093	238.043	238.043	253.447	0.493546
				316.754	316.754	333.453	2.2096	292.666	292.666	307.999	1.40647
				493.163	493.163	509.84	3.05064	339.601	339.601	354.736	1.81143
				334.659	334.659	351.087	2.39264	332.984	332.984	347.764	0.662831
				336.896	336.896	353.313	1.47258	316.855	316.855	331.513	2.1055
				294.5	294.5	310.857	2.38884	409.14	409.14	423.518	3.02496
				363.402	363.402	379.663	2.68127	378.857	378.857	393.229	2.39967
				431.452	431.452	447.647	2.17956	368.012	368.012	382.352	2.1178
				351.392	351.392	367.562	1.92861	520.577	520.577	534.786	2.57167
				395.887	395.887	412.032	2.61128	337.73	337.73	351.844	2.03731
				325.433	325.433	341.555	2.75357	354.768	354.768	368.867	1.97204
				368.289	368.289	384.268	2.47311	297.901	297.901	311.911	1.80653
				432.627	432.627	448.453	2.06704	341.671	341.671	355.664	2.65241
				334.74	334.74	350.473	3.14194	346.872	346.872	360.621	2.0923
				298.339	298.339	314.027	1.01254	383.112	383.112	396.764	2.15056
				382.916	382.916	398.588	2.15505	264.524	264.524	278.066	1.48367
				292.968	292.968	308.548	1.80708	375.598	375.598	388.988	2.07748
				310.883	310.883	326.314	1.8498	424.547	424.547	437.728	2.63942
				460.902	460.902	476.046	2.98461	325.534	325.534	338.435	1.38033
				462.296	462.296	477.435	2.69637	260.323	260.323	273.208	0.825938
				378.618	378.618	393.735	2.26972	406.118	406.118	418.993	2.65396
				362.688	362.688	377.598	1.55001	388.284	388.284	401.088	1.389
				455.874	455.874	470.703	2.39548	437.422	437.422	450.191	3.12833
				293.947	293.947	308.742	2.03919	330.198	330.198	342.882	1.23824
				403.274	403.274	418.003	2.5375	429.109	429.109	441.76	2.09488
				385.357	385.357	399.97	0.649021	298.215	298.215	310.76	1.60035
				297.994	297.994	312.529	2.38441	391.547	391.547	404.025	2.73816
				392.292	392.292	406.744	1.69325	356.201	356.201	368.547	2.15165
				299.406	299.406	313.788	0.716457	295.851	295.851	308.053	1.85037
				329.803	329.803	344.005	2.5795	240.754	240.754	252.85	0.655481
				359.377	359.377	373.548	2.5151	297.215	297.215	309.292	2.19959
				356.765	356.765	370.913	2.726	309.545	309.545	321.62	1.87583
				304.869	304.869	318.919	2.02856	321.358	321.358	333.335	1.89739
				333.107	333.107	347.147	1.682	346.219	346.219	358.172	1.98997
				425.345	425.345	439.326	2.43607	395.979	395.979	407.757	2.06689
				378.224	378.224	392.09	1.42215	402.218	402.218	413.951	2.51572
				330.725	330.725	344.453	2.17075	371.902	371.902	383.611	2.6627
				347.683	347.683	361.348	1.70152	403.141	403.141	414.794	2.38694
				412.618	412.618	426.199	1.71632	423.846	423.846	435.387	1.00317
				269.085	269.085	282.663	1.69331	354.144	354.144	365.635	1.24499
				394.005	394.005	407.448	2.52952	398.36	398.36	409.781	2.38126
				358.759	358.759	372.065	1.57689	238.424	238.424	249.839	0.801084
				405.835	405.835	419.107	2.32876	274.221	274.221	285.464	1.51688
				326.384	326.384	339.442	0.857293	532.963	532.963	544.206	1.83181
				328.423	328.423	341.336	2.14764	415.221	415.221	426.398	2.55223
				307.07	307.07	319.977	1.87933	348.699	348.699	359.775	1.89555
				276.053	276.053	288.891	1.51632	428.488	428.488	439.479	2.39724
				305.899	305.899	318.653	1.78479	221.064	221.064	231.955	-0.536595
				327.873	327.873	340.594	1.75721	265.601	265.601	276.436	1.2383
				419.089	419.089	431.701	3.01317	404.289	404.289	414.954	1.98146
				374.468	374.468	386.964	0.738883	261.8	261.8	272.454	0.978779
				368.399	368.399	380.712	2.55546	430.45	430.45	441.029	2.41373
				404.732	404.732	416.85	2.17352	348.952	348.952	359.488	1.28795
				296.301	296.301	308.364	0.789558	257.906	257.906	268.39	1.16564
				339.286	339.286	351.305	1.07114	327.887	327.887	338.328	0.512077
				374.368	374.368	386.364	1.68274	416.644	416.644	426.999	2.72091
				353.927	353.927	365.805	1.87562	268.711	268.711	279.008	0.860546
				384.883	384.883	396.601	2.29332	394.058	394.058	404.321	0.759442
				337.717	337.717	349.064	1.34598	255.122	255.122	265.325	0.269279
				268.911	268.911	280.14	1.91584	284.505	284.505	294.677	1.77421
				404.904	404.904	415.874	2.83816	330.948	330.948	341.036	1.81754
				339.22	339.22	350.122	1.72824	316.872	316.872	326.96	1.87413
				316.366	316.366	327.094	1.39425	350.582	350.582	360.556	1.36825
				334.891	334.891	345.465	2.06605	285.272	285.272	295.189	1.14036
				437.006	437.006	447.516	2.12872	327.461	327.461	337.149	2.12913
				323.068	323.068	333.556	1.92919	421.216	421.216	430.76	2.02191
				400.614	400.614	411.082	3.13498	329.325	329.325	338.761	1.15449
				385.343	385.343	395.727	2.34649	375.678	375.678	385.082	2.86344
				435.652	435.652	445.841	1.39831	409.059	409.059	418.426	2.3038
				548.175	548.175	558.271	2.92444	288.54	288.54	297.837	0.960618
				320.225	320.225	330.314	1.90455	407.456	407.456	416.732	2.44983
				299.731	299.731	309.663	2.73594	244.018	244.018	253.238	0.831176
				357.538	357.538	367.448	0.903144	340.305	340.305	349.448	1.65925
				409.601	409.601	419.5	2.02217	382	382	390.969	2.04778
				499.278	499.278	509.167	3.04822	364.894	364.894	373.762	2.23196
				397.182	397.182	406.954	1.1052	436.713	436.713	445.356	0.424093
				347.995	347.995	357.129	0.908767	338.661	338.661	347.282	1.01626
				416.876	416.876	425.974	2.08785	456.085	456.085	464.647	2.36812
				395.757	395.757	404.755	2.28307	286.607	286.607	295.03	1.50621
				422.85	422.85	431.709	1.60131	264.801	264.801	273.008	1.07989
				384.211	384.211	392.79	1.44605	268.264	268.264	276.457	0.0713205
				308.954	308.954	317.458	0.821694	379.395	379.395	387.198	2.43229
				289.336	289.336	297.822	0.96296	256.243	256.243	263.964	0.905763
				348.925	348.925	357.331	1.96065	365.629	365.629	373.346	2.05073
				306.17	306.17	314.466	0.612474	266.355	266.355	273.834	0.714987
				330.848	330.848	339.105	1.38938	285.829	285.829	293.097	1.67352
				349.48	349.48	357.667	1.72981	250.16	250.16	257.426	0.169787
				304.674	304.674	312.716	1.98478	336.311	336.311	343.548	2.00321
				334.586	334.586	342.216	1.47625	332.783	332.783	339.981	2.3632
				392.478	392.478	399.996	2.349	300.155	300.155	307.292	1.39735
				431.326	431.326	438.597	1.38544	331.671	331.671	338.634	2.01974
				451.348	451.348	458.552	2.7139	350.529	350.529	357.339	0.882726
				367.304	367.304	374.421	2.54681	447.091	447.091	453.798	3.28256
				369.957	369.957	376.912	0.510814	236.795	236.795	243.379	-0.0802125
				327.185	327.185	334.049	1.27593	273.284	273.284	279.811	1.48045
				341.62	341.62	348.471	3.01535	464.36	464.36	470.872	0.973844
				360.69	360.69	367.357	1.95769	264.002	264.002	270.456	0.643619
				320.638	320.638	327.24	2.47928	476.855	476.855	483.141	1.75752
				415.415	415.415	422.001	2.861	271.438	271.438	277.551	0.757582
				325.169	325.169	331.741	1.6346	387.421	387.421	393.504	2.01843
				321.128	321.128	327.689	1.90493	314.262	314.262	320.215	1.18872
				334.827	334.827	341.372	1.79541	244.857	244.857	250.784	1.18062
				315.4	315.4	321.911	1.05426	252.63	252.63	258.538	0.40725
				384.03	384.03	390.494	1.7608	303.732	303.732	309.572	2.62762
				430.311	430.311	436.754	2.11871	319.81	319.81	325.615	0.960312
				255.77	255.77	262.199	1.66394	242.729	242.729	248.39	0.249887
				324.992	324.992	331.057	0.728889	350.834	350.834	356.462	1.68696
				363.196	363.196	368.508	1.85424	256.697	256.697	262.208	0.515162
				403.488	403.488	408.746	2.80194	273.772	273.772	279.266	1.18517
				300.558	300.558	305.797	1.9833	328.987	328.987	334.465	2.49741
				288.738	288.738	293.584	3.04799	415.962	415.962	421.424	2.59215
				357.158	357.158	361.777	1.83063	404.726	404.726	410.076	3.02254
				393.613	393.613	398.105	1.96096	306.56	306.56	311.679	1.45335
				293.198	293.198	297.596	1.17373	378.168	378.168	382.949	1.65962
				467.832	467.832	472.219	2.53609	246.568	246.568	251.277	0.493842
				364.249	364.249	368.615	1.69449	336.521	336.521	341.217	2.14356
				353.255	353.255	357.603	1.32703	355.545	355.545	360.189	1.74239
				425.771	425.771	430.091	1.21236	362.089	362.089	366.643	1.6544
				367.365	367.365	371.531	2.26051	290.569	290.569	295.061	0.355716
				304.332	304.332	308.359	2.48754	362.255	362.255	366.659	2.22667
				336.852	336.852	340.655	2.00976	323.426	323.426	327.782	0.643821
				341.283	341.283	344.978	2.64019	421.77	421.77	426.124	2.30125
				300.227	300.227	303.807	1.02836	363.764	363.764	368.111	1.86427
				386.649	386.649	389.826	2.05811	276.087	276.087	280.298	0.971729
				295.993	295.993	299.132	1.61798	253.687	253.687	257.893	0.364648
				378.032	378.032	380.878	2.47681	280.133	280.133	284.273	1.77447
				393.033	393.033	395.84	2.40789	239.366	239.366	243.371	1.38606
				312.235	312.235	314.723	1.58068	345.944	345.944	349.784	1.51362
				485.641	485.641	488.019	3.46676	374.741	374.741	378.347	1.73601
				364.213	364.213	366.544	1.78386	285.998	285.998	289.388	0.746319
				472.864	472.864	475.16	2.41493	404.355	404.355	407.735	2.77934
				373.684	373.684	375.939	2.54538	413.772	413.772	417.055	2.83939
				434.795	434.795	436.839	2.22477	471.626	471.626	474.793	3.16319
				335.253	335.253	337.172	1.95188	285.198	285.198	288.359	1.29767
				329.827	329.827	331.385	2.27173	296.084	296.084	299.051	1.20926
				384.54	384.54	386.011	2.9433	260.137	260.137	263.068	0.853992
				407.698	407.698	409.115	1.10285	283.318	283.318	285.947	1.78962
				467.402	467.402	468.786	2.10147	367.126	367.126	369.753	2.14137
				321.808	321.808	323.043	1.68978	311.532	311.532	313.936	2.1031
				393.937	393.937	394.61	1.17733	270.618	270.618	273.011	1.59609
				315.022	315.022	315.615	1.98195	304.302	304.302	306.646	1.48137
				337.182	337.182	337.744	1.87291	389.875	389.875	392.026	1.3042
				433.666	433.666	434.219	3.18999	425.96	425.96	428.105	2.13461
				320.942	320.942	321.21	0.553691	277.525	277.525	279.634	1.55443
				376.238	377.2	376.238	2.72767	335.012	335.012	337.118	2.07313
				415.658	416.794	415.658	2.26411	331.923	331.923	333.86	1.53142
				317.323	318.659	317.323	1.97412	442.124	442.124	444.007	2.65117
				448.498	449.837	448.498	1.85149	394.407	394.407	395.984	2.50907
				311.228	312.949	311.228	1.57352	283.863	283.863	285.36	0.181618
				487.344	489.877	487.344	3.31683	307.755	307.755	309.113	1.37987
				390.768	393.596	390.768	1.87209	276.003	276.003	277.31	0.604769
				366.052	368.925	366.052	1.99306	245.314	245.314	246.6	0.239706
				376.583	379.956	376.583	1.83252	318.913	318.913	320.108	1.56762
				355.114	358.795	355.114	2.09236	247.489	247.489	248.519	0.825096
				428.786	432.845	428.786	2.84951	412.426	412.426	413.104	1.77861
				334.646	341.091	334.646	1.75513	228.188	228.188	228.84	0.779228
				373.396	379.944	373.396	1.86035	349.68	349.68	350.159	1.30749
				418.12	424.718	418.12	2.68723	455.595	455.595	456.012	1.76031
				435.297	442.543	435.297	1.8489	289.355	289.355	289.756	1.07512
				381.018	389.373	381.018	2.91472	390.009	390.009	390.248	2.39315
				400.027	408.446	400.027	1.99376	263.704	263.704	263.925	-0.0239262
				380.886	389.466	380.886	0.97468	397.997	398.212	397.997	2.57559
				366.052	377.247	366.052	2.5827	388.323	389.088	388.323	1.03366
				366.42	377.844	366.42	2.20732	280.949	281.771	280.949	2.06714
				513.671	525.378	513.671	1.92553	365.915	366.742	365.915	1.09866
				260.919	274.834	260.919	1.41333	327.809	328.937	327.809	1.27075
				369.023	383.735	369.023	3.14485	462.019	463.214	462.019	2.81712
				312.989	327.741	312.989	1.91838	268.239	269.596	268.239	1.03396
				449.136	465.633	449.136	3.0793	363.148	364.97	363.148	2.03185
				414.608	433.373	414.608	2.58444	267.385	269.299	267.385	0.0572338
				324.513	344.291	324.513	1.96741	288.415	290.394	288.415	0.487253
				275.3	296.103	275.3	0.295764	399.853	402.177	399.853	1.30674
								416.895	419.442	416.895	2.79
								258.05	261.036	258.05	0.801858
								274.707	278.576	274.707	1.44049
								246.108	250.127	246.108	1.0534
								332.693	336.813	332.693	2.18573
								262.112	267.144	262.112	0.152492
								378.461	384.209	378.461	2.5597
								299.597	305.731	299.597	0.642222
								256.46	263.072	256.46	-0.154419
								305.049	311.951	305.049	0.724521
								402.864	410.237	402.864	2.04391
								278.953	286.637	278.953	1.75799
								265.948	273.985	265.948	0.578332
								302.512	310.58	302.512	0.566074
								314.158	322.985	314.158	1.85362
								362.984	372.78	362.984	2.29267
								241.484	251.735	241.484	0.772484
								423.768	434.111	423.768	2.30836
								445.665	456.221	445.665	2.6917
								351.053	361.901	351.053	1.77361
								275.977	287.789	275.977	1.43597
								363.868	376.38	363.868	2.18373
								540.725	554.975	540.725	3.16139
								257.185	273.041	257.185	0.932008
								362.217	378.801	362.217	1.25157
								409.413	428.304	409.413	2.01636
								231.238	252.451	231.238	0.197633
								326.867	350.615	326.867	0.951922
								369.175	393.919	369.175	1.8451
1022
1024
1026
1028
1030
1032
1034
1036
1038
1040
1042
1044
1046
1048
1050
1052
1054
1056
1058
1060
1062
1064
1066
1068
1070
1072
1074
1076
1078
1080
1082
1084
1086
1088
1090
1092
1094
1096
1098
1100
1102
1104
1106
1108
1110
1112
1114
1116
1118
1120
1122
1124
1126
1128
1130
1132
1134
1136
1138
1140
1142
1144
1146
1148
1150
1152
1154
1156
1158
1160
1162
1164
1166
1168
1170
1172
1174
1176
1178
1180
1182
1184
1186
1188
1190
1192
1194
1196
1198
1200
1202
1204
1206
1208
1210
1212
1214
1216
1218
1220
1222
1224
1226
1228
1230
1232
1234
1236
1238
1240
1242
1244
1246
1248
1250
1252
1254
1256
1258
1260
1262
1264
1266
1268
1270
1272
1274
1276
1278
1280
1282
1284
1286
1288
1290
1292
1294
1296
1298
1300
1302
1304
1306
1308
1310
1312
1314
1316
1318
1320
1322
1324
1326
1328
1330
1332
1334
1336
1338
1340
1342
1344
1346
1348
1350
1352
1354
1356
1358
1360
1362
1364
1366
1368
1370
1372
1374
1376
1378
1380
1382
1384
1386
1388
1390
1392
1394
1396
1398
1400
1402
1404
1406
1408
1410
1412
1414
1416
1418
1420
1422
1424
1426
1428
1430
1432
1434
1436
1438
1440
1442
1444
1446
1448
1450
1452
1454
1456
1458
1460
1462
1464
1466
1468
1470
1472
1474
1476
1478
1480
1482
1484
1486
1488
1490
1492
1494
1496
1498
1500
1502.5
1505
1507.5
1510
1512.5
1515
1517.5
1520
1522.5
1525
1527.5
1530
1532.5
1535
1537.5
1540
1542.5
1545
1547.5
1550
1552.5
1555
1557.5
1560
1562.5
1565
1567.5
1570
1572.5
1575
1577.5
1580
1582.5
1585
1587.5
1590
1592.5
1595
1597.5
1600
1602.5
1605
1607.5
1610
1612.5
1615
1617.5
1620
1622.5
1625
1627.5
1630
1632.5
1635
1637.5
1640
1642.5
1645
1647.5
1650
1652.5
1655
1657.5
1660
1662.5
1665
1667.5
1670
1672.5
1675
1677.5
1680
1682.5
1685
1687.5
1690
1692.5
1695
1697.5
1700
1702.5
1705
1707.5
1710
1712.5
1715
1717.5
1720
1722.5
1725
1727.5
1730
1732.5
1735
1737.5
1740
1742.5
1745
1747.5
1750
1752.5
1755
1757.5
1760
1762.5
1765
1767.5
1770
1772.5
1775
1777.5
1780
1782.5
1785
1787.5
1790
1792.5
1795
1797.5
1800
1802.5
1805
1807.5
1810
1812.5
1815
1817.5
1820
1822.5
1825
1827.5
1830
1832.5
1835
1837.5
1840
1842.5
1845
1847.5
1850
1852.5
1855
1857.5
1860
1862.5
1865
1867.5
1870
1872.5
1875
1877.5
1880
1882.5
1885
1887.5
1890
1892.5
1895
1897.5
1900
1902.5
1905
1907.5
1910
1912.5
1915
1917.5
1920
1922.5
1925
1927.5
1930
1932.5
1935
1937.5
1940
1942.5
1945
1947.5
1950
1952.5
1955
1957.5
1960
1962.5
1965
1967.5
1970
1972.5
1975
1977.5
1980
1982.5
1985
1987.5
1990
1992.5
1995
1997.5
2000
2002.5
2005
2007.5
2010
2012.5
2015
2017.5
2020
2022.5
2025
2027.5
2030
2032.5
2035
2037.5
2040
2042.5
2045
2047.5
2050
2052.5
2055
2057.5
2060
2062.5
2065
2067.5
2070
2072.5
2075
2077.5
2080
2082.5
2085
2087.5
2090
2092.5
2095
2097.5
2100
2102.5
2105
2107.5
2110
2112.5
2115
2117.5
2120
2122.5
2125
2127.5
2130
2132.5
2135
2137.5
2140
2142.5
2145
2147.5
2150
2152.5
2155
2157.5
2160
2162.5
2165
2167.5
2170
2172.5
2175
2177.5
2180
2182.5
2185
2187.5
2190
2192.5
2195
2197.5
2200
2202.5
2205
2207.5
2210
2212.5
2215
2217.5
2220
2222.5
2225
2227.5
2230
2232.5
2235
2237.5
2240
2242.5
2245
2247.5
2250
2252.5
2255
2257.5
2260
2262.5
2265
2267.5
2270
2272.5
2275
2277.5
2280
2282.5
2285
2287.5
2290
2292.5
2295
2297.5
2300
2302.5
2305
2307.5
2310
2312.5
2315
2317.5
2320
2322.5
2325
2327.5
2330
2332.5
2335
2337.5
2340
2342.5
2345
2347.5
2350
2352.5
2355
2357.5
2360
2362.5
2365
2367.5
2370
2372.5
2375
2377.5
2380
2382.5
2385
2387.5
2390
2392.5
2395
2397.5
2400
2402.5
2405
2407.5
2410
2412.5
2415
2417.5
2420
2422.5
2425
2427.5
2430
2432.5
2435
2437.5
2440
2442.5
2445
2447.5
2450
2452.5
2455
2457.5
2460
2462.5
2465
2467.5
2470
2472.5
2475
2477.5
2480
2482.5
2485
2487.5
2490
2492.5
2495
2497.5
2500
2502.5
2505
2507.5
2510
2512.5
2515
2517.5
2520
2522.5
2525
2527.5
2530
2532.5
2535
2537.5
2540
2542.5
2545
2547.5
2550
2552.5
2555
2557.5
2560
2562.5
2565
2567.5
2570
2572.5
2575
2577.5
2580
2582.5
2585
2587.5
2590
2592.5
2595
2597.5
2600
2602.5
2605
2607.5
2610
2612.5
2615
2617.5
2620
2622.5
2625
2627.5
2630
2632.5
2635
2637.5
2640
2642.5
2645
2647.5
2650
2652.5
2655
2657.5
2660
2662.5
2665
2667.5
2670
2672.5
2675
2677.5
2680
2682.5
2685
2687.5
2690
2692.5
2695
2697.5
2700
2702.5
2705
2707.5
2710
2712.5
2715
2717.5
2720
2722.5
2725
2727.5
2730
2732.5
2735
2737.5
2740
2742.5
2745
2747.5
2750
2752.5
2755
2757.5
2760
2762.5
2765
2767.5
2770
2772.5
2775
2777.5
2780
2782.5
2785
2787.5
2790
2792.5
2795
2797.5
2800
2802.5
2805
2807.5
2810
2812.5
2815
2817.5
2820
2822.5
2825
2827.5
2830
2832.5
2835
2837.5
2840
2842.5
2845
2847.5
2850
2852.5
2855
2857.5
2860
2862.5
2865
2867.5
2870
2872.5
2875
2877.5
2880
2882.5
2885
2887.5
2890
2892.5
2895
2897.5
2900
2902.5
2905
2907.5
2910
2912.5
2915
2917.5
2920
2922.5
2925
2927.5
2930
2932.5
2935
2937.5
2940
2942.5
2945
2947.5
2950
2952.5
2955
2957.5
2960
2962.5
2965
2967.5
2970
2972.5
2975
2977.5
2980
2982.5
2985
2987.5
2990
2992.5
2995
2997.5
3000
3005
3010
3015
3020
3025
3030
3035
3040
3045
3050
3055
3060
3065
3070
3075
3080
3085
3090
3095
3100
3105
3110
3115
3120
3125
3130
3135
3140
3145
3150
3155
3160
3165
3170
3175
3180
3185
3190
3195
3200
3205
3210
3215
3220
3225
3230
3235
3240
3245
3250
3255
3260
3265
3270
3275
3280
3285
3290
3295
3300
3305
3310
3315
3320
3325
3330
3335
3340
3345
3350
3355
3360
3365
3370
3375
3380
3385
3390
3395
3400
3405
3410
3415
3420
3425
3430
3435
3440
3445
3450
3455
3460
3465
3470
3475
3480
3485
3490
3495
3500
3505
3510
3515
3520
3525
3530
3535
3540
3545
3550
3555
3560
3565
3570
3575
3580
3585
3590
3595
3600
3605
3610
3615
3620
3625
3630
3635
3640
3645
3650
3655
3660
3665
3670
3675
3680
3685
3690
3695
3700
3705
3710
3715
3720
3725
3730
3735
3740
3745
3750
3755
3760
3765
3770
3775
3780
3785
3790
3795
3800
3805
3810
3815
3820
3825
3830
3835
3840
3845
3850
3855
3860
3865
3870
3875
3880
3885
3890
3895
3900
3905
3910
3915
3920
3925
3930
3935
3940
3945
3950
3955
3960
3965
3970
3975
3980
3985
3990
3995
4000
4005
4010
4015
4020
4025
4030
4035
4040
4045
4050
4055
4060
4065
4070
4075
4080
4085
4090
4095
4100
4105
4110
4115
4120
4125
4130
4135
4140
4145
4150
4155
4160
4165
4170
4175
4180
4185
4190
4195
4200
4205
4210
4215
4220
4225
4230
4235
4240
4245
4250
4255
4260
4265
4270
4275
4280
4285
4290
4295
4300
4305
4310
4315
4320
4325
4330
4335
4340
4345
4350
4355
4360
4365
4370
4375
4380
4385
4390
4395
4400
4405
4410
4415
4420
4425
4430
4435
4440
4445
4450
4455
4460
4465
4470
4475
4480
4485
4490
4495
4500
4505
4510
4515
4520
4525
4530
4535
4540
4545
4550
4555
4560
4565
4570
4575
4580
4585
4590
4595
4600
4605
4610
4615
4620
4625
4630
4635
4640
4645
4650
4655
4660
4665
4670
4675
4680
4685
4690
4695
4700
4705
4710
4715
4720
4725
4730
4735
4740
4745
4750
4755
4760
4765
4770
4775
4780
4785
4790
4795
4800
4805
4810
4815
4820
4825
4830
4835
4840
4845
4850
4855
4860
4865
4870
4875
4880
4885
4890
4895
4900
4905
4910
4915
4920
4925
4930
4935
4940
4945
4950
4955
4960
4965
4970
4975
4980
4985
4990
4995
5000
5005
5010
5015
5020
5025
5030
5035
5040
5045
5050
5055
5060
5065
5070
5075
5080
5085
5090
5095
5100
5105
5110
5115
5120
5125
5130
5135
5140
5145
5150
5155
5160
5165
5170
5175
5180
5185
5190
5195
5200
5205
5210
5215
5220
5225
5230
5235
5240
5245
5250
5255
5260
5265
5270
5275
5280
5285
5290
5295
5300
5305
5310
5315
5320

## Sheet: Metadata
Data Description
Dentoglobigerinid size data and carbon isotope data
D.globosa_Size				Size of test in D.globosa
D.globosa_U_Axis_Major				Maximum test size axis in D.globosa
D.globosa_L_Axis_Major				Minimum test size axis in D.globosa
d13C_D.globosa				Stable carbon isotope of single specimen in D.globosa
D.baroemoenensis_Size				Size of test in D.baroemoenensis
D.baroemoenensis_U_Axis_Major (µm)				Maximum test size axis in D.baroemoenensis
D.baroemoenensis_L_Axis_Major (µm)				Minimum test size axis in D.baroemoenensis
d13C_D.baroemoenensis				Stable carbon isotope of single specimen in D.baroemoenensis
D.altispira_Size				Size of test in D.altispira
D.altispira_U_Axis_Major (µm)				Maximum test size axis in D.altispira
D.altispira_L_Axis_Major (µm)				Minimum test size axis in D.altispira
d13C_D.altispira				Stable carbon isotope of single specimen in D.altispira
