# Supplementary material for: Paleoecology and evolutionary response of planktonic foraminifera to the mid-Pliocene Warm Period and Plio-Pleistocene bipolar ice sheet expansion
Source: Copernicus journal article supplement (doi:10.5194/bg-20-121-2023), 2023-01-09
Supplement: Supplementary file 4 [file TableS4_Dentoglobigerina_Oxygen_Isotope_v_size.xlsx]

## Sheet: Size_d18O
D.globosa_Size	D.globosa_U_Axis_Major	D.globosa_L_Axis_Major	d18O_D.globosa	D.baroemoenensis_Size	D.baroemoenensis_U_Axis_Major (µm)	D.baroemoenensis_L_Axis_Major (µm)	d18O_D.baroemoenensis	D.altispira_Size	D.altispira_U_Axis_Major (µm)	D.altispira_L_Axis_Major (µm)	d18O_D.altispira
307.871	307.871	323.066	-1.64287	406.638	406.638	451.709	-1.68287	415.294	415.294	478.471	-1.57111
435.496	435.496	450.316	-1.50684	395.426	395.426	432.019	-2.02435	437.201	437.201	498.08	-1.54409
326.54	326.54	338.79	-1.70575	276.133	276.133	311.72	-0.902631	397.598	397.598	445.384	-2.06736
411.58	411.58	423.535	-1.32672	391.396	391.396	426.621	-1.33265	434.99	434.99	482.524	-1.52365
354.725	354.725	359.161	-1.9216	360.124	360.124	395.287	-1.07481	419.087	419.087	466.569	-1.59757
260.73	260.73	264.31	-1.05012	370.346	370.346	404.907	-1.65306	438.148	438.148	484.624	-0.954158
306.505	306.505	309.381	-1.32236	291.415	291.415	325.401	-0.925056	466.537	466.537	509.674	-0.816743
				417.37	417.37	451.12	-1.11196	414.482	414.482	456.514	-1.13485
				515.339	515.339	548.811	-0.991393	429.634	429.634	467.148	-0.858644
				347.06	347.06	380.362	-1.7412	468.323	468.323	505.48	-1.91483
				434.754	434.754	467.288	-1.46909	343.905	343.905	380.789	-1.56496
				617.934	617.934	650.363	-1.09452	289.494	289.494	325.32	-1.33243
				428.073	428.073	460.401	-1.62233	423.831	423.831	459.584	-1.66927
				325.37	325.37	357.662	-1.07399	480.969	480.969	516.674	-1.35683
				401.76	401.76	433.987	-1.33158	487.907	487.907	522.732	-1.26488
				428.636	428.636	460.755	-0.999545	317.381	317.381	352.194	-1.16117
				371.487	371.487	402.694	-1.54864	504.519	504.519	538.428	-1.06078
				414.321	414.321	445.4	-0.989474	573.865	573.865	607.568	-1.24574
				345.99	345.99	376.614	-1.01644	355.375	355.375	387.804	-1.02005
				401.164	401.164	431.153	-0.841604	369.842	369.842	401.958	-1.38724
				445.673	445.673	475.606	-1.30993	378.597	378.597	410.374	-1.26088
				290.305	290.305	320.055	-0.527123	366.584	366.584	397.774	-1.74811
				316.612	316.612	346.255	-1.33539	372.467	372.467	403.637	-1.74898
				347.34	347.34	376.926	-1.15861	274.257	274.257	305.119	-1.3603
				368.212	368.212	397.798	-2.08786	421.873	421.873	452.302	-1.38815
				328.943	328.943	358.073	-1.12535	356.783	356.783	387.174	-1.44219
				311.409	311.409	340.015	-1.3061	375.391	375.391	405.407	-0.957215
				340.549	340.549	369.047	-1.61917	486.319	486.319	516.132	-1.63589
				436.114	436.114	464.547	-1.36838	357.698	357.698	386.961	-1.32294
				402.661	402.661	430.882	-0.701145	357.8	357.8	385.796	-1.2845
				434.58	434.58	462.764	-1.32748	517.62	517.62	545.521	-0.91831
				481.129	481.129	509.286	-0.825962	313.232	313.232	341.008	-1.6228
				264.725	264.725	292.643	-1.80756	510.825	510.825	538.514	-1.37331
				343.143	343.143	370.839	-1.18544	464.019	464.019	491.565	-1.29789
				309.649	309.649	337.071	-1.62355	380.573	380.573	407.256	-1.05813
				328.583	328.583	355.867	-1.05867	368.482	368.482	394.831	-1.81114
				321.487	321.487	348.681	-0.704863	351.775	351.775	377.921	-1.30424
				424.999	424.999	451.938	-1.41817	323.137	323.137	348.97	-1.38937
				459.683	459.683	486.434	-1.15854	311.844	311.844	337.605	-1.89246
				391.676	391.676	418.188	-1.28254	416.461	416.461	442.194	-1.36074
				352.825	352.825	379.246	-1.50387	306.178	306.178	331.74	-1.45271
				391.483	391.483	417.741	-1.66551	401.949	401.949	427.487	-1.84235
				418.923	418.923	445.093	-0.751218	361.564	361.564	387.065	-0.491849
				482.775	482.775	508.697	-1.816	284.308	284.308	309.757	-1.22478
				284.544	284.544	310.465	-0.761591	279.435	279.435	304.862	-1.34578
				443.439	443.439	469.323	-1.10785	460.504	460.504	485.76	-3.55885
				293.328	293.328	318.925	-0.818459	425.968	425.968	451.065	-1.47267
				306.952	306.952	332.051	-1.76287	398.216	398.216	423.11	-0.865685
				337.228	337.228	362.057	-1.68994	412.355	412.355	437.157	-1.08581
				363.497	363.497	388.067	-0.996345	443.947	443.947	468.665	-1.4339
				380.758	380.758	405.119	-1.28047	290.823	290.823	315.307	-0.65041
				395.695	395.695	419.837	-1.51759	314.586	314.586	338.983	-1.16744
				478.678	478.678	502.711	-1.69177	436.914	436.914	461.263	-1.67112
				364.377	364.377	388.332	-1.43817	407.052	407.052	431.196	-1.77115
				513.491	513.491	537.426	-1.4151	387.175	387.175	410.754	-1.67705
				348.082	348.082	371.871	-1.461	334.042	334.042	357.604	-1.11635
				341.469	341.469	365.173	-0.712971	508.662	508.662	532.11	-0.508152
				314.334	314.334	337.929	-1.32712	366.213	366.213	389.656	-0.912656
				388.768	388.768	412.029	-1.77244	316.59	316.59	339.94	-1.173
				350.793	350.793	373.823	-1.08717	494.085	494.085	517.069	-1.49519
				508.737	508.737	531.583	-0.907064	328.542	328.542	351.512	-1.34465
				294.97	294.97	317.607	-0.67632	395.783	395.783	418.732	-0.980687
				352.956	352.956	374.487	-1.38478	471.297	471.297	494.226	-0.372527
				332.752	332.752	354.122	-0.813187	404.851	404.851	427.592	-1.81452
				407.332	407.332	428.584	-1.56124	312.505	312.505	334.899	-1.32311
				441.088	441.088	462.1	-1.66053	294.061	294.061	315.903	-1.16279
				311.163	311.163	332.15	-1.04578	340.401	340.401	362.234	-1.41956
				436.004	436.004	456.987	-1.09609	259.699	259.699	281.388	-0.781786
				409.574	409.574	430.252	-1.45629	318.389	318.389	339.987	-0.942633
				286.123	286.123	306.62	-1.80508	321.381	321.381	342.552	-1.65876
				297.166	297.166	317.651	-1.34273	371.046	371.046	391.835	-1.54208
				357.271	357.271	377.461	-1.66945	375.871	375.871	396.597	-1.08988
				405.241	405.241	425.393	-1.22385	358.441	358.441	378.821	-1.68405
				409.201	409.201	428.794	-1.12365	319.965	319.965	340.207	-1.10313
				279.474	279.474	298.956	-1.29139	344.402	344.402	364.28	-1.24495
				413.486	413.486	432.927	-1.4265	375.376	375.376	395.124	-1.23974
				272.707	272.707	292.133	-1.26914	332.615	332.615	352.346	-0.550658
				302.682	302.682	322.056	-2.03689	325.615	325.615	345.342	-0.98864
				332.765	332.765	352.118	-0.77684	301.17	301.17	320.885	-0.256117
				426.302	426.302	445.541	-0.487154	469.695	469.695	489.285	-0.712035
				393.92	393.92	413.145	-1.82523	257.187	257.187	276.682	-1.60494
				295.28	295.28	314.429	-0.342873	481.826	481.826	501.27	-1.25034
				295.782	295.782	314.925	-1.43507	278.592	278.592	297.96	-0.634552
				358.673	358.673	377.532	-0.819466	260.202	260.202	279.482	-1.49504
				364.533	364.533	383.362	-0.74803	409.19	409.19	428.416	-1.21218
				369.309	369.309	388.092	-1.50923	371.982	371.982	391.015	-1.45452
				448.34	448.34	467.096	-0.89455	383.133	383.133	402.066	-0.316621
				419.68	419.68	438.398	-1.75337	451.233	451.233	469.976	-1.3746
				300.799	300.799	319.444	-1.99292	282.719	282.719	301.19	-1.38085
				359.241	359.241	377.718	-2.00933	220.178	220.178	238.598	-0.638636
				369.733	369.733	388.174	-0.902348	480.694	480.694	498.962	-1.4599
				343.257	343.257	361.605	-1.5942	357.977	357.977	375.98	-1.75956
				363.054	363.054	381.3	-0.879814	448.647	448.647	466.591	-1.26654
				401.205	401.205	419.448	-0.946374	292.837	292.837	310.67	-1.83297
				337.597	337.597	355.823	-1.32074	410.114	410.114	427.825	-0.316003
				334.319	334.319	352.493	-1.51591	360.412	360.412	378.12	-0.45246
				275.171	275.171	293.312	-2.05609	491.192	491.192	508.855	-1.70575
				346.33	346.33	364.415	-0.591323	461.542	461.542	479.177	-0.796226
				463.08	463.08	480.959	-1.32444	338.916	338.916	356.389	-1.44148
				353.063	353.063	370.914	-0.720917	322.81	322.81	340.275	-1.42534
				533.002	533.002	550.73	-1.02282	418.025	418.025	435.31	-2.13996
				472.983	472.983	490.585	-0.892431	344.868	344.868	362.148	-1.13509
				336.933	336.933	354.513	-1.04094	334.582	334.582	351.801	-1.22283
				363.091	363.091	380.67	-1.05059	352.176	352.176	368.815	-0.453902
				455.32	455.32	472.871	-1.01301	230.274	230.274	246.838	-1.38281
				372.757	372.757	390.29	-1.22947	350.322	350.322	366.847	-1.4848
				298.405	298.405	315.797	-1.67878	276.739	276.739	293.191	-1.47266
				468.263	468.263	485.571	-1.44515	413.874	413.874	430.288	-1.30658
				327.339	327.339	344.548	-0.757836	325.934	325.934	342.08	-1.01764
				384.934	384.934	402.05	-0.939226	550.496	550.496	566.598	-1.3312
				375.783	375.783	392.631	-0.875934	337.805	337.805	353.8	-1.44836
				448.586	448.586	465.429	-1.53176	393.668	393.668	409.562	-0.990821
				284.819	284.819	301.638	-0.539071	463.188	463.188	478.909	-1.41755
				470.82	470.82	487.588	-1.64651	364.964	364.964	380.448	-0.772969
				396.34	396.34	413.104	-1.28304	238.043	238.043	253.447	-0.373749
				316.754	316.754	333.453	-1.41041	292.666	292.666	307.999	-0.616019
				493.163	493.163	509.84	-0.976208	339.601	339.601	354.736	-2.31491
				334.659	334.659	351.087	-1.4427	332.984	332.984	347.764	-0.822291
				336.896	336.896	353.313	-1.54874	316.855	316.855	331.513	-1.30116
				294.5	294.5	310.857	-1.08997	409.14	409.14	423.518	-1.73957
				363.402	363.402	379.663	-0.983079	378.857	378.857	393.229	-1.16529
				431.452	431.452	447.647	-1.2489	368.012	368.012	382.352	-1.66532
				351.392	351.392	367.562	-1.75638	520.577	520.577	534.786	-1.44406
				395.887	395.887	412.032	-1.20172	337.73	337.73	351.844	-1.0515
				325.433	325.433	341.555	-1.32174	354.768	354.768	368.867	-0.903872
				368.289	368.289	384.268	-1.36465	297.901	297.901	311.911	-1.65325
				432.627	432.627	448.453	-1.30187	341.671	341.671	355.664	-1.29388
				334.74	334.74	350.473	-1.54036	346.872	346.872	360.621	-1.34386
				298.339	298.339	314.027	-0.889013	383.112	383.112	396.764	-0.739057
				382.916	382.916	398.588	-1.2754	264.524	264.524	278.066	-1.24483
				292.968	292.968	308.548	-1.37023	375.598	375.598	388.988	-2.08817
				310.883	310.883	326.314	-1.77726	424.547	424.547	437.728	-1.27481
				460.902	460.902	476.046	-1.34587	325.534	325.534	338.435	-1.23675
				462.296	462.296	477.435	-1.18508	260.323	260.323	273.208	-0.888037
				378.618	378.618	393.735	-1.92193	406.118	406.118	418.993	-1.35912
				362.688	362.688	377.598	-1.04771	388.284	388.284	401.088	-1.43078
				455.874	455.874	470.703	-2.01846	437.422	437.422	450.191	-1.01601
				293.947	293.947	308.742	-1.84863	330.198	330.198	342.882	-0.745387
				403.274	403.274	418.003	-1.10994	429.109	429.109	441.76	-0.885769
				385.357	385.357	399.97	-2.99217	298.215	298.215	310.76	-1.67981
				297.994	297.994	312.529	-1.61551	391.547	391.547	404.025	-1.18204
				392.292	392.292	406.744	-1.66511	356.201	356.201	368.547	-1.44424
				299.406	299.406	313.788	-1.20838	295.851	295.851	308.053	-1.17351
				329.803	329.803	344.005	-1.67033	240.754	240.754	252.85	-0.819902
				359.377	359.377	373.548	-1.07984	297.215	297.215	309.292	-1.83776
				356.765	356.765	370.913	-1.95263	309.545	309.545	321.62	-1.74894
				304.869	304.869	318.919	-1.43914	321.358	321.358	333.335	-1.78459
				333.107	333.107	347.147	-1.09394	346.219	346.219	358.172	-0.934835
				425.345	425.345	439.326	-1.2547	395.979	395.979	407.757	-1.30714
				378.224	378.224	392.09	-1.18327	402.218	402.218	413.951	-1.41305
				330.725	330.725	344.453	-1.38091	371.902	371.902	383.611	-1.60719
				347.683	347.683	361.348	-2.2372	403.141	403.141	414.794	-1.2239
				412.618	412.618	426.199	-1.49167	423.846	423.846	435.387	-0.426447
				269.085	269.085	282.663	-1.99157	354.144	354.144	365.635	-1.06627
				394.005	394.005	407.448	-0.626099	398.36	398.36	409.781	-1.22402
				358.759	358.759	372.065	-0.83656	238.424	238.424	249.839	-0.942193
				405.835	405.835	419.107	-1.19887	274.221	274.221	285.464	-0.943215
				326.384	326.384	339.442	-1.32822	532.963	532.963	544.206	-0.945354
				328.423	328.423	341.336	-1.20583	415.221	415.221	426.398	-1.53966
				307.07	307.07	319.977	-1.78872	348.699	348.699	359.775	-1.43656
				276.053	276.053	288.891	-0.842446	428.488	428.488	439.479	-1.33468
				305.899	305.899	318.653	-1.49422	221.064	221.064	231.955	-0.406188
				327.873	327.873	340.594	-1.26352	265.601	265.601	276.436	-1.21015
				419.089	419.089	431.701	-1.37608	404.289	404.289	414.954	-1.59941
				374.468	374.468	386.964	-0.869366	261.8	261.8	272.454	-0.811475
				368.399	368.399	380.712	-1.0659	430.45	430.45	441.029	-1.72164
				404.732	404.732	416.85	-1.27015	348.952	348.952	359.488	-1.3071
				296.301	296.301	308.364	-1.56367	257.906	257.906	268.39	-0.736855
				339.286	339.286	351.305	-0.861119	327.887	327.887	338.328	-1.00847
				374.368	374.368	386.364	-1.0728	416.644	416.644	426.999	-1.31991
				353.927	353.927	365.805	-1.15968	268.711	268.711	279.008	-0.796468
				384.883	384.883	396.601	-1.98455	394.058	394.058	404.321	-1.55091
				337.717	337.717	349.064	-1.26237	255.122	255.122	265.325	-0.588508
				268.911	268.911	280.14	-1.20744	284.505	284.505	294.677	-1.33783
				404.904	404.904	415.874	-1.56622	330.948	330.948	341.036	-1.86756
				339.22	339.22	350.122	-1.06808	316.872	316.872	326.96	-1.37289
				316.366	316.366	327.094	-1.57524	350.582	350.582	360.556	-1.07674
				334.891	334.891	345.465	-1.05378	285.272	285.272	295.189	-0.911053
				437.006	437.006	447.516	-1.24288	327.461	327.461	337.149	-1.06033
				323.068	323.068	333.556	-0.960441	421.216	421.216	430.76	-1.16634
				400.614	400.614	411.082	-1.50189	329.325	329.325	338.761	-0.69791
				385.343	385.343	395.727	-1.27528	375.678	375.678	385.082	-1.75313
				435.652	435.652	445.841	-0.172776	409.059	409.059	418.426	-1.00345
				548.175	548.175	558.271	-1.92106	288.54	288.54	297.837	-1.16504
				320.225	320.225	330.314	-1.32138	407.456	407.456	416.732	-1.32547
				299.731	299.731	309.663	-1.41593	244.018	244.018	253.238	-0.660603
				357.538	357.538	367.448	-1.74499	340.305	340.305	349.448	-0.750595
				409.601	409.601	419.5	-1.31531	382	382	390.969	-1.10809
				499.278	499.278	509.167	-0.79777	364.894	364.894	373.762	-1.59208
				397.182	397.182	406.954	-0.941746	436.713	436.713	445.356	-0.496595
				347.995	347.995	357.129	-0.976749	338.661	338.661	347.282	-1.63003
				416.876	416.876	425.974	-1.06171	456.085	456.085	464.647	-1.23797
				395.757	395.757	404.755	-1.2852	286.607	286.607	295.03	-1.53494
				422.85	422.85	431.709	-2.13704	264.801	264.801	273.008	-0.837928
				384.211	384.211	392.79	-1.26011	268.264	268.264	276.457	-3.3537
				308.954	308.954	317.458	-0.389637	379.395	379.395	387.198	-1.72408
				289.336	289.336	297.822	-0.336476	256.243	256.243	263.964	-0.97297
				348.925	348.925	357.331	-1.55751	365.629	365.629	373.346	-1.53758
				306.17	306.17	314.466	-0.599756	266.355	266.355	273.834	-0.899453
				330.848	330.848	339.105	-1.30157	285.829	285.829	293.097	-1.75177
				349.48	349.48	357.667	-0.728475	250.16	250.16	257.426	-0.198319
				304.674	304.674	312.716	-0.631456	336.311	336.311	343.548	-1.25922
				334.586	334.586	342.216	-1.08258	332.783	332.783	339.981	-1.55533
				392.478	392.478	399.996	-1.30487	300.155	300.155	307.292	-0.900906
				431.326	431.326	438.597	-1.36855	331.671	331.671	338.634	-1.59838
				451.348	451.348	458.552	-1.5466	350.529	350.529	357.339	-0.634226
				367.304	367.304	374.421	-1.3909	447.091	447.091	453.798	-1.5941
				369.957	369.957	376.912	-2.00102	236.795	236.795	243.379	-0.653183
				327.185	327.185	334.049	-0.351072	273.284	273.284	279.811	-1.09487
				341.62	341.62	348.471	-0.950393	464.36	464.36	470.872	-0.243732
				360.69	360.69	367.357	-1.48335	264.002	264.002	270.456	-1.36515
				320.638	320.638	327.24	-1.65323	476.855	476.855	483.141	-1.62406
				415.415	415.415	422.001	-1.4404	271.438	271.438	277.551	-1.39811
				325.169	325.169	331.741	-1.42184	387.421	387.421	393.504	-1.23909
				321.128	321.128	327.689	-1.07165	314.262	314.262	320.215	-0.548324
				334.827	334.827	341.372	-1.44875	244.857	244.857	250.784	-1.75814
				315.4	315.4	321.911	-1.54017	252.63	252.63	258.538	-0.626554
				384.03	384.03	390.494	-0.838412	303.732	303.732	309.572	-1.64287
				430.311	430.311	436.754	-1.01684	319.81	319.81	325.615	-0.653237
				255.77	255.77	262.199	-1.37591	242.729	242.729	248.39	-0.940588
				324.992	324.992	331.057	-0.716045	350.834	350.834	356.462	-1.5243
				363.196	363.196	368.508	-1.05283	256.697	256.697	262.208	-1.14146
				403.488	403.488	408.746	-1.49857	273.772	273.772	279.266	-1.2637
				300.558	300.558	305.797	-1.373	328.987	328.987	334.465	-1.51553
				288.738	288.738	293.584	-1.76209	415.962	415.962	421.424	-1.48527
				357.158	357.158	361.777	-1.05373	404.726	404.726	410.076	-1.5602
				393.613	393.613	398.105	-1.49775	306.56	306.56	311.679	-1.24768
				293.198	293.198	297.596	-1.09211	378.168	378.168	382.949	-1.50767
				467.832	467.832	472.219	-1.24502	246.568	246.568	251.277	-0.241669
				364.249	364.249	368.615	-0.99776	336.521	336.521	341.217	-0.687237
				353.255	353.255	357.603	-1.99005	355.545	355.545	360.189	-1.6154
				425.771	425.771	430.091	-0.552234	362.089	362.089	366.643	-1.20765
				367.365	367.365	371.531	-1.10493	290.569	290.569	295.061	-0.643447
				304.332	304.332	308.359	-1.3046	362.255	362.255	366.659	-1.39962
				336.852	336.852	340.655	-1.4592	323.426	323.426	327.782	-0.240675
				341.283	341.283	344.978	-1.17232	421.77	421.77	426.124	-0.898215
				300.227	300.227	303.807	-0.425459	363.764	363.764	368.111	-1.65059
				386.649	386.649	389.826	-1.74813	276.087	276.087	280.298	-0.232834
				295.993	295.993	299.132	-0.596733	253.687	253.687	257.893	-0.889728
				378.032	378.032	380.878	-1.47886	280.133	280.133	284.273	-1.9136
				393.033	393.033	395.84	-0.948627	239.366	239.366	243.371	-2.07081
				312.235	312.235	314.723	-1.47076	345.944	345.944	349.784	-1.60984
				485.641	485.641	488.019	-1.66675	374.741	374.741	378.347	-0.406386
				364.213	364.213	366.544	-2.32247	285.998	285.998	289.388	-0.67451
				472.864	472.864	475.16	-1.24011	404.355	404.355	407.735	-1.42326
				373.684	373.684	375.939	-0.438258	413.772	413.772	417.055	-1.05878
				434.795	434.795	436.839	-0.773668	471.626	471.626	474.793	-1.1845
				335.253	335.253	337.172	-1.94093	285.198	285.198	288.359	-0.938097
				329.827	329.827	331.385	-1.42046	296.084	296.084	299.051	-0.677815
				384.54	384.54	386.011	-1.9146	260.137	260.137	263.068	-1.47043
				407.698	407.698	409.115	-1.08186	283.318	283.318	285.947	-1.25472
				467.402	467.402	468.786	-0.781012	367.126	367.126	369.753	-1.45618
				321.808	321.808	323.043	-1.47435	311.532	311.532	313.936	-0.760174
				393.937	393.937	394.61	-0.996852	270.618	270.618	273.011	-1.49589
				315.022	315.022	315.615	-0.667417	304.302	304.302	306.646	-1.38616
				337.182	337.182	337.744	-0.847083	389.875	389.875	392.026	-0.93678
				433.666	433.666	434.219	-1.35635	425.96	425.96	428.105	-2.36504
				320.942	320.942	321.21	-0.590921	277.525	277.525	279.634	-1.31599
				376.238	377.2	376.238	-1.32816	335.012	335.012	337.118	-0.900917
				415.658	416.794	415.658	-1.27817	331.923	331.923	333.86	-1.70316
				317.323	318.659	317.323	-1.26789	442.124	442.124	444.007	-1.50951
				448.498	449.837	448.498	-1.03891	394.407	394.407	395.984	-1.38888
				311.228	312.949	311.228	-0.388712	283.863	283.863	285.36	-1.18587
				487.344	489.877	487.344	-1.37751	307.755	307.755	309.113	-0.479404
				390.768	393.596	390.768	-1.14963	276.003	276.003	277.31	-1.50222
				366.052	368.925	366.052	-1.62835	245.314	245.314	246.6	-0.581296
				376.583	379.956	376.583	-1.21758	318.913	318.913	320.108	-1.11303
				355.114	358.795	355.114	-1.731	247.489	247.489	248.519	-0.854159
				428.786	432.845	428.786	-1.01633	412.426	412.426	413.104	-0.726334
				334.646	341.091	334.646	-1.08794	228.188	228.188	228.84	-0.873697
				373.396	379.944	373.396	-0.874451	349.68	349.68	350.159	-1.64094
				418.12	424.718	418.12	-1.40454	455.595	455.595	456.012	-1.73271
				435.297	442.543	435.297	-1.62214	289.355	289.355	289.756	-2.55719
				381.018	389.373	381.018	-1.16511	390.009	390.009	390.248	-1.22462
				400.027	408.446	400.027	-1.66117	263.704	263.704	263.925	-0.71269
				380.886	389.466	380.886	-0.987929	397.997	398.212	397.997	-0.425947
				366.052	377.247	366.052	-1.11873	388.323	389.088	388.323	-0.92427
				366.42	377.844	366.42	-1.90235	280.949	281.771	280.949	-1.47282
				513.671	525.378	513.671	-0.603632	365.915	366.742	365.915	-0.937597
				260.919	274.834	260.919	-1.38622	327.809	328.937	327.809	-0.482748
				369.023	383.735	369.023	-1.55231	462.019	463.214	462.019	-1.66692
				312.989	327.741	312.989	-1.28657	268.239	269.596	268.239	-0.847355
				449.136	465.633	449.136	-1.0468	363.148	364.97	363.148	-1.02439
				414.608	433.373	414.608	-1.41687	267.385	269.299	267.385	-0.0339373
				324.513	344.291	324.513	-1.94768	288.415	290.394	288.415	-0.704204
				275.3	296.103	275.3	-1.41368	399.853	402.177	399.853	-1.65506
								416.895	419.442	416.895	-1.65406
								258.05	261.036	258.05	-1.07168
								274.707	278.576	274.707	-1.97859
								246.108	250.127	246.108	-1.13953
								332.693	336.813	332.693	-1.12767
								262.112	267.144	262.112	-0.482112
								378.461	384.209	378.461	-1.78975
								299.597	305.731	299.597	-0.794023
								256.46	263.072	256.46	-0.448113
								305.049	311.951	305.049	-1.10666
								402.864	410.237	402.864	-0.949901
								278.953	286.637	278.953	-1.50357
								265.948	273.985	265.948	-0.968028
								302.512	310.58	302.512	-0.826449
								314.158	322.985	314.158	-1.79663
								362.984	372.78	362.984	-1.29501
								241.484	251.735	241.484	-0.811981
								423.768	434.111	423.768	-1.35353
								445.665	456.221	445.665	-1.41597
								351.053	361.901	351.053	-1.12004
								275.977	287.789	275.977	-0.976717
								363.868	376.38	363.868	-1.07142
								540.725	554.975	540.725	-1.10754
								257.185	273.041	257.185	-0.607721
								362.217	378.801	362.217	-0.836537
								409.413	428.304	409.413	-1.0985
								231.238	252.451	231.238	-1.00397
								326.867	350.615	326.867	-0.995746
								369.175	393.919	369.175	-1.27873

## Sheet: Metadata
Data Description
Dentoglobigerinid size data and oxygen isotope data
D.globosa_Size				Size of test in D.globosa
D.globosa_U_Axis_Major				Maximum test size axis in D.globosa
D.globosa_L_Axis_Major				Minimum test size axis in D.globosa
d18O_D.globosa				Stable oxygen isotope of single specimen in D.globosa
D.baroemoenensis_Size				Size of test in D.baroemoenensis
D.baroemoenensis_U_Axis_Major (µm)				Maximum test size axis in D.baroemoenensis
D.baroemoenensis_L_Axis_Major (µm)				Minimum test size axis in D.baroemoenensis
d18O_D.baroemoenensis				Stable oxygen isotope of single specimen in D.baroemoenensis
D.altispira_Size				Size of test in D.altispira
D.altispira_U_Axis_Major (µm)				Maximum test size axis in D.altispira
D.altispira_L_Axis_Major (µm)				Minimum test size axis in D.altispira
d18O_D.altispira				Stable oxygen isotope of single specimen in D.altispira
