# Supplementary material for: Paleoecology and evolutionary response of planktonic foraminifera to the mid-Pliocene Warm Period and Plio-Pleistocene bipolar ice sheet expansion
Source: Copernicus journal article supplement (doi:10.5194/bg-20-121-2023), 2023-01-09
Supplement: Supplementary file 5 [file TableS5_D.altispira_Phase_Isotope_v_size.xlsx]

## Sheet: D.altispira_Phase_Isotope_v_siz
D.altispira_P2	D.altispira_U_Axis_Major (µm)	D.altispira_L_Axis_Major (µm)	d13C_D.altispira_P2	d18O_D.altispira_P2	D.altispira_P1	D.altispira_U_Axis_Major (µm)	D.altispira_L_Axis_Major (µm)	d13C_D.altispira_P1	d18O_D.altispira_P1
343.91	343.91	380.79	2.03	-1.56	415.294	415.294	478.471	2.99606	-1.57111
372.47	372.47	403.64	2.87	-1.75	437.201	437.201	498.08	2.45469	-1.54409
486.32	486.32	516.13	2.11	-1.64	397.598	397.598	445.384	2.63152	-2.06736
471.3	471.3	494.23	0.5	-0.37	434.99	434.99	482.524	2.82392	-1.52365
318.39	318.39	339.99	0.83	-0.94	419.087	419.087	466.569	2.43248	-1.59757
491.19	491.19	508.85	2.74	-1.71	438.148	438.148	484.624	1.62793	-0.954158
418.03	418.03	435.31	2.95	-2.14	466.537	466.537	509.674	2.66882	-0.816743
325.93	325.93	342.08	1.6	-1.02	414.482	414.482	456.514	2.20265	-1.13485
292.67	292.67	308	1.41	-0.62	429.634	429.634	467.148	1.91939	-0.858644
339.6	339.6	354.74	1.81	-2.31	468.323	468.323	505.48	2.86865	-1.91483
332.98	332.98	347.76	0.66	-0.82	289.494	289.494	325.32	2.05859	-1.33243
321.36	321.36	333.33	1.9	-1.78	423.831	423.831	459.584	3.28277	-1.66927
354.14	354.14	365.64	1.24	-1.07	480.969	480.969	516.674	3.01308	-1.35683
261.8	261.8	272.45	0.98	-0.81	487.907	487.907	522.732	2.78642	-1.26488
327.89	327.89	338.33	0.51	-1.01	317.381	317.381	352.194	0.800719	-1.16117
268.71	268.71	279.01	0.86	-0.8	504.519	504.519	538.428	3.1575	-1.06078
255.12	255.12	265.32	0.27	-0.59	573.865	573.865	607.568	2.81316	-1.24574
421.22	421.22	430.76	2.02	-1.17	355.375	355.375	387.804	1.54584	-1.02005
340.31	340.31	349.45	1.66	-0.75	369.842	369.842	401.958	2.4263	-1.38724
436.71	436.71	445.36	0.42	-0.5	378.597	378.597	410.374	2.11455	-1.26088
264.8	264.8	273.01	1.08	-0.84	366.584	366.584	397.774	3.22598	-1.74811
365.63	365.63	373.35	2.05	-1.54	274.257	274.257	305.119	1.12097	-1.3603
303.73	303.73	309.57	2.63	-1.64	421.873	421.873	452.302	2.14789	-1.38815
319.81	319.81	325.61	0.96	-0.65	356.783	356.783	387.174	1.73773	-1.44219
253.69	253.69	257.89	0.36	-0.89	375.391	375.391	405.407	2.29137	-0.957215
286	286	289.39	0.75	-0.67	357.698	357.698	386.961	2.28517	-1.32294
277.52	277.52	279.63	1.55	-1.32	357.8	357.8	385.796	1.99589	-1.2845
349.68	349.68	350.16	1.31	-1.64	517.62	517.62	545.521	2.06982	-0.91831
263.7	263.7	263.93	-0.02	-0.71	313.232	313.232	341.008	2.10851	-1.6228
267.39	269.3	267.39	0.06	-0.03	510.825	510.825	538.514	2.55392	-1.37331
402.86	410.24	402.86	2.04	-0.95	464.019	464.019	491.565	2.71531	-1.29789
409.41	428.3	409.41	2.02	-1.1	380.573	380.573	407.256	1.14097	-1.05813
369.18	393.92	369.18	1.85	-1.28	368.482	368.482	394.831	2.18257	-1.81114
					351.775	351.775	377.921	1.87996	-1.30424
					323.137	323.137	348.97	1.96913	-1.38937
					311.844	311.844	337.605	2.54643	-1.89246
					416.461	416.461	442.194	2.23659	-1.36074
					306.178	306.178	331.74	1.36078	-1.45271
					401.949	401.949	427.487	2.57988	-1.84235
					361.564	361.564	387.065	1.4145	-0.491849
					284.308	284.308	309.757	2.06094	-1.22478
					279.435	279.435	304.862	1.49978	-1.34578
					460.504	460.504	485.76	1.34792	-3.55885
					425.968	425.968	451.065	3.52701	-1.47267
					398.216	398.216	423.11	1.55644	-0.865685
					412.355	412.355	437.157	2.60155	-1.08581
					443.947	443.947	468.665	3.12582	-1.4339
					290.823	290.823	315.307	0.45767	-0.65041
					314.586	314.586	338.983	1.72467	-1.16744
					436.914	436.914	461.263	3.07249	-1.67112
					407.052	407.052	431.196	2.41534	-1.77115
					387.175	387.175	410.754	2.57727	-1.67705
					334.042	334.042	357.604	1.88638	-1.11635
					508.662	508.662	532.11	2.0734	-0.508152
					366.213	366.213	389.656	1.44454	-0.912656
					316.59	316.59	339.94	1.79763	-1.173
					494.085	494.085	517.069	2.60619	-1.49519
					328.542	328.542	351.512	1.8753	-1.34465
					395.783	395.783	418.732	1.13719	-0.980687
					404.851	404.851	427.592	2.12098	-1.81452
					312.505	312.505	334.899	2.06799	-1.32311
					294.061	294.061	315.903	1.41502	-1.16279
					340.401	340.401	362.234	1.50756	-1.41956
					259.699	259.699	281.388	0.761136	-0.781786
					321.381	321.381	342.552	2.03806	-1.65876
					371.046	371.046	391.835	2.67922	-1.54208
					375.871	375.871	396.597	2.07976	-1.08988
					358.441	358.441	378.821	2.22128	-1.68405
					319.965	319.965	340.207	2.41916	-1.10313
					344.402	344.402	364.28	2.1959	-1.24495
					375.376	375.376	395.124	2.10365	-1.23974
					332.615	332.615	352.346	0.935142	-0.550658
					325.615	325.615	345.342	2.07196	-0.98864
					301.17	301.17	320.885	1.07883	-0.256117
					469.695	469.695	489.285	2.7272	-0.712035
					257.187	257.187	276.682	1.1045	-1.60494
					481.826	481.826	501.27	2.48308	-1.25034
					278.592	278.592	297.96	1.76964	-0.634552
					260.202	260.202	279.482	1.15096	-1.49504
					409.19	409.19	428.416	2.33466	-1.21218
					371.982	371.982	391.015	2.14155	-1.45452
					383.133	383.133	402.066	1.58548	-0.316621
					451.233	451.233	469.976	3.34785	-1.3746
					282.719	282.719	301.19	1.85877	-1.38085
					220.178	220.178	238.598	0.661182	-0.638636
					480.694	480.694	498.962	2.69566	-1.4599
					357.977	357.977	375.98	2.28405	-1.75956
					448.647	448.647	466.591	2.66521	-1.26654
					292.837	292.837	310.67	1.73567	-1.83297
					410.114	410.114	427.825	0.693697	-0.316003
					360.412	360.412	378.12	1.27708	-0.45246
					461.542	461.542	479.177	1.64277	-0.796226
					338.916	338.916	356.389	1.81944	-1.44148
					322.81	322.81	340.275	1.95507	-1.42534
					344.868	344.868	362.148	1.86585	-1.13509
					334.582	334.582	351.801	2.18321	-1.22283
					352.176	352.176	368.815	0.562964	-0.453902
					230.274	230.274	246.838	1.18751	-1.38281
					350.322	350.322	366.847	2.65589	-1.4848
					276.739	276.739	293.191	1.31062	-1.47266
					413.874	413.874	430.288	2.12193	-1.30658
					550.496	550.496	566.598	3.29111	-1.3312
					337.805	337.805	353.8	2.50866	-1.44836
					393.668	393.668	409.562	2.19107	-0.990821
					463.188	463.188	478.909	2.75051	-1.41755
					364.964	364.964	380.448	1.80667	-0.772969
					238.043	238.043	253.447	0.493546	-0.373749
					316.855	316.855	331.513	2.1055	-1.30116
					409.14	409.14	423.518	3.02496	-1.73957
					378.857	378.857	393.229	2.39967	-1.16529
					368.012	368.012	382.352	2.1178	-1.66532
					520.577	520.577	534.786	2.57167	-1.44406
					337.73	337.73	351.844	2.03731	-1.0515
					354.768	354.768	368.867	1.97204	-0.903872
					297.901	297.901	311.911	1.80653	-1.65325
					341.671	341.671	355.664	2.65241	-1.29388
					346.872	346.872	360.621	2.0923	-1.34386
					383.112	383.112	396.764	2.15056	-0.739057
					264.524	264.524	278.066	1.48367	-1.24483
					375.598	375.598	388.988	2.07748	-2.08817
					424.547	424.547	437.728	2.63942	-1.27481
					325.534	325.534	338.435	1.38033	-1.23675
					260.323	260.323	273.208	0.825938	-0.888037
					406.118	406.118	418.993	2.65396	-1.35912
					388.284	388.284	401.088	1.389	-1.43078
					437.422	437.422	450.191	3.12833	-1.01601
					330.198	330.198	342.882	1.23824	-0.745387
					429.109	429.109	441.76	2.09488	-0.885769
					298.215	298.215	310.76	1.60035	-1.67981
					391.547	391.547	404.025	2.73816	-1.18204
					356.201	356.201	368.547	2.15165	-1.44424
					295.851	295.851	308.053	1.85037	-1.17351
					240.754	240.754	252.85	0.655481	-0.819902
					297.215	297.215	309.292	2.19959	-1.83776
					309.545	309.545	321.62	1.87583	-1.74894
					346.219	346.219	358.172	1.98997	-0.934835
					395.979	395.979	407.757	2.06689	-1.30714
					402.218	402.218	413.951	2.51572	-1.41305
					371.902	371.902	383.611	2.6627	-1.60719
					403.141	403.141	414.794	2.38694	-1.2239
					423.846	423.846	435.387	1.00317	-0.426447
					398.36	398.36	409.781	2.38126	-1.22402
					238.424	238.424	249.839	0.801084	-0.942193
					274.221	274.221	285.464	1.51688	-0.943215
					532.963	532.963	544.206	1.83181	-0.945354
					415.221	415.221	426.398	2.55223	-1.53966
					348.699	348.699	359.775	1.89555	-1.43656
					428.488	428.488	439.479	2.39724	-1.33468
					221.064	221.064	231.955	-0.536595	-0.406188
					265.601	265.601	276.436	1.2383	-1.21015
					404.289	404.289	414.954	1.98146	-1.59941
					430.45	430.45	441.029	2.41373	-1.72164
					348.952	348.952	359.488	1.28795	-1.3071
					257.906	257.906	268.39	1.16564	-0.736855
					416.644	416.644	426.999	2.72091	-1.31991
					394.058	394.058	404.321	0.759442	-1.55091
					284.505	284.505	294.677	1.77421	-1.33783
					330.948	330.948	341.036	1.81754	-1.86756
					316.872	316.872	326.96	1.87413	-1.37289
					350.582	350.582	360.556	1.36825	-1.07674
					285.272	285.272	295.189	1.14036	-0.911053
					327.461	327.461	337.149	2.12913	-1.06033
					329.325	329.325	338.761	1.15449	-0.69791
					375.678	375.678	385.082	2.86344	-1.75313
					409.059	409.059	418.426	2.3038	-1.00345
					288.54	288.54	297.837	0.960618	-1.16504
					407.456	407.456	416.732	2.44983	-1.32547
					244.018	244.018	253.238	0.831176	-0.660603
					382	382	390.969	2.04778	-1.10809
					364.894	364.894	373.762	2.23196	-1.59208
					338.661	338.661	347.282	1.01626	-1.63003
					456.085	456.085	464.647	2.36812	-1.23797
					286.607	286.607	295.03	1.50621	-1.53494
					268.264	268.264	276.457	0.0713205	-3.3537
					379.395	379.395	387.198	2.43229	-1.72408
					256.243	256.243	263.964	0.905763	-0.97297
					266.355	266.355	273.834	0.714987	-0.899453
					285.829	285.829	293.097	1.67352	-1.75177
					250.16	250.16	257.426	0.169787	-0.198319
					336.311	336.311	343.548	2.00321	-1.25922
					332.783	332.783	339.981	2.3632	-1.55533
					300.155	300.155	307.292	1.39735	-0.900906
					331.671	331.671	338.634	2.01974	-1.59838
					350.529	350.529	357.339	0.882726	-0.634226
					447.091	447.091	453.798	3.28256	-1.5941
					236.795	236.795	243.379	-0.0802125	-0.653183
					273.284	273.284	279.811	1.48045	-1.09487
					464.36	464.36	470.872	0.973844	-0.243732
					264.002	264.002	270.456	0.643619	-1.36515
					476.855	476.855	483.141	1.75752	-1.62406
					271.438	271.438	277.551	0.757582	-1.39811
					387.421	387.421	393.504	2.01843	-1.23909
					314.262	314.262	320.215	1.18872	-0.548324
					244.857	244.857	250.784	1.18062	-1.75814
					252.63	252.63	258.538	0.40725	-0.626554
					242.729	242.729	248.39	0.249887	-0.940588
					350.834	350.834	356.462	1.68696	-1.5243
					256.697	256.697	262.208	0.515162	-1.14146
					273.772	273.772	279.266	1.18517	-1.2637
					328.987	328.987	334.465	2.49741	-1.51553
					415.962	415.962	421.424	2.59215	-1.48527
					404.726	404.726	410.076	3.02254	-1.5602
					306.56	306.56	311.679	1.45335	-1.24768
					378.168	378.168	382.949	1.65962	-1.50767
					246.568	246.568	251.277	0.493842	-0.241669
					336.521	336.521	341.217	2.14356	-0.687237
					355.545	355.545	360.189	1.74239	-1.6154
					362.089	362.089	366.643	1.6544	-1.20765
					290.569	290.569	295.061	0.355716	-0.643447
					362.255	362.255	366.659	2.22667	-1.39962
					323.426	323.426	327.782	0.643821	-0.240675
					421.77	421.77	426.124	2.30125	-0.898215
					363.764	363.764	368.111	1.86427	-1.65059
					276.087	276.087	280.298	0.971729	-0.232834
					280.133	280.133	284.273	1.77447	-1.9136
					239.366	239.366	243.371	1.38606	-2.07081
					345.944	345.944	349.784	1.51362	-1.60984
					374.741	374.741	378.347	1.73601	-0.406386
					404.355	404.355	407.735	2.77934	-1.42326
					413.772	413.772	417.055	2.83939	-1.05878
					471.626	471.626	474.793	3.16319	-1.1845
					285.198	285.198	288.359	1.29767	-0.938097
					296.084	296.084	299.051	1.20926	-0.677815
					260.137	260.137	263.068	0.853992	-1.47043
					283.318	283.318	285.947	1.78962	-1.25472
					367.126	367.126	369.753	2.14137	-1.45618
					311.532	311.532	313.936	2.1031	-0.760174
					270.618	270.618	273.011	1.59609	-1.49589
					304.302	304.302	306.646	1.48137	-1.38616
					389.875	389.875	392.026	1.3042	-0.93678
					425.96	425.96	428.105	2.13461	-2.36504
					335.012	335.012	337.118	2.07313	-0.900917
					331.923	331.923	333.86	1.53142	-1.70316
					442.124	442.124	444.007	2.65117	-1.50951
					394.407	394.407	395.984	2.50907	-1.38888
					283.863	283.863	285.36	0.181618	-1.18587
					307.755	307.755	309.113	1.37987	-0.479404
					276.003	276.003	277.31	0.604769	-1.50222
					245.314	245.314	246.6	0.239706	-0.581296
					318.913	318.913	320.108	1.56762	-1.11303
					247.489	247.489	248.519	0.825096	-0.854159
					412.426	412.426	413.104	1.77861	-0.726334
					228.188	228.188	228.84	0.779228	-0.873697
					455.595	455.595	456.012	1.76031	-1.73271
					289.355	289.355	289.756	1.07512	-2.55719
					390.009	390.009	390.248	2.39315	-1.22462
					397.997	398.212	397.997	2.57559	-0.425947
					388.323	389.088	388.323	1.03366	-0.92427
					280.949	281.771	280.949	2.06714	-1.47282
					365.915	366.742	365.915	1.09866	-0.937597
					327.809	328.937	327.809	1.27075	-0.482748
					462.019	463.214	462.019	2.81712	-1.66692
					268.239	269.596	268.239	1.03396	-0.847355
					363.148	364.97	363.148	2.03185	-1.02439
					288.415	290.394	288.415	0.487253	-0.704204
					399.853	402.177	399.853	1.30674	-1.65506
					416.895	419.442	416.895	2.79	-1.65406
					258.05	261.036	258.05	0.801858	-1.07168
					274.707	278.576	274.707	1.44049	-1.97859
					246.108	250.127	246.108	1.0534	-1.13953
					332.693	336.813	332.693	2.18573	-1.12767
					262.112	267.144	262.112	0.152492	-0.482112
					378.461	384.209	378.461	2.5597	-1.78975
					299.597	305.731	299.597	0.642222	-0.794023
					256.46	263.072	256.46	-0.154419	-0.448113
					305.049	311.951	305.049	0.724521	-1.10666
					278.953	286.637	278.953	1.75799	-1.50357
					265.948	273.985	265.948	0.578332	-0.968028
					302.512	310.58	302.512	0.566074	-0.826449
					314.158	322.985	314.158	1.85362	-1.79663
					362.984	372.78	362.984	2.29267	-1.29501
					241.484	251.735	241.484	0.772484	-0.811981
					423.768	434.111	423.768	2.30836	-1.35353
					445.665	456.221	445.665	2.6917	-1.41597
					351.053	361.901	351.053	1.77361	-1.12004
					275.977	287.789	275.977	1.43597	-0.976717
					363.868	376.38	363.868	2.18373	-1.07142
					540.725	554.975	540.725	3.16139	-1.10754
					257.185	273.041	257.185	0.932008	-0.607721
					362.217	378.801	362.217	1.25157	-0.836537
					231.238	252.451	231.238	0.197633	-1.00397
					326.867	350.615	326.867	0.951922	-0.995746

## Sheet: Metadata
Data Description
Dentoglobigerina altispira size data and carbon isotope data
D.altispira_P2			Size of test in Phase 2
D.altispira_U_Axis_Major (µm)			Maximum test size axis in Phase 2
D.altispira_L_Axis_Major (µm)			Minimum test size axis in Phase 2
d13C_D.altispira_P2			Stable carbon isotope of single specimen in Phase 2
d18O_D.altispira_P2			Stable oxygen isotope of single specimen in Phase 2
D.altispira_P1			Size of test in Phase 1
D.altispira_U_Axis_Major (µm)			Maximum test size axis in Phase 1
D.altispira_L_Axis_Major (µm)			Minimum test size axis in Phase 1
d13C_D.altispira_P1			Stable carbon isotope of single specimen in Phase 1
d18O_D.altispira_P1			Stable oxygen isotope of single specimen in Phase 1
